1 **Migration through a major Andean ecogeographic disruption as a driver of**  
2 **genotypic and phenotypic diversity in a wild tomato species**

3  
4 Jacob B. Landis<sup>1,2,#</sup>, Christopher M. Miller<sup>3,#</sup>, Amanda K. Broz<sup>3</sup>, Alexandra A. Bennett<sup>2</sup>, Noelia  
5 Carrasquilla-Garcia<sup>4</sup>, Douglas R. Cook<sup>4</sup>, Robert L. Last<sup>5,6</sup>, Patricia A. Bedinger<sup>3</sup>, Gaurav D.  
6 Moghe<sup>2,5,\*</sup>

7  
8 **Short title:**

9 Evolution of *Solanum habrochaites* populations

10  
11 **Author affiliations:**

12 <sup>1</sup> Department of Botany and Plant Sciences, University of California, Riverside, California, USA

13 <sup>2</sup> Plant Biology Section, School of Integrative Plant Science, Cornell University, Ithaca, New  
14 York, USA

15 <sup>3</sup> Department of Biology, Colorado State University, Fort Collins, Colorado, USA

16 <sup>4</sup> Department of Plant Pathology, University of California, Davis, California, USA

17 <sup>5</sup> Department of Biochemistry and Molecular Biology, Michigan State University, East Lansing,  
18 Michigan, USA

19 <sup>6</sup> Department of Plant Biology, Michigan State University, East Lansing, Michigan, USA

20  
21  
22 # Both authors contributed equally to this study

23 \* Corresponding author: [gdm67@cornell.edu](mailto:gdm67@cornell.edu)

## 24 **Abstract**

25 The large number of species on our planet arises from the phenotypic variation and reproductive  
26 isolation occurring at the population level. In this study, we sought to understand the origins of  
27 such population-level variation in defensive acylsugar chemistry and mating systems in *Solanum*  
28 *habrochaites* – a wild tomato species found in diverse Andean habitats in Ecuador and Peru. Using  
29 Restriction-Associated-Digestion Sequencing (RAD-seq) of 50 *S. habrochaites* accessions, we  
30 identified eight population clusters generated via isolation and hybridization dynamics of 4-6  
31 ancestral populations. Estimation of heterozygosity, fixation index, isolation by distance, and  
32 migration probabilities, allowed identification of multiple barriers to gene flow leading to the  
33 establishment of extant populations. One major barrier is the Amotape-Huancabamba Zone (AHZ)  
34 – a geographical feature in the Andes with high endemism, where the mountainous range breaks  
35 up into isolated microhabitats. The AHZ was associated with emergence of alleles for novel  
36 reproductive and acylsugar phenotypes. These alleles led to the evolution of self-compatibility in  
37 the northern populations, where alleles for novel defense-related enzyme variants were also found  
38 to be fixed. We identified geographical distance as a major force causing population differentiation  
39 in the central/southern part of the range, where *S. habrochaites* was also inferred to have  
40 originated. Findings presented here highlight the role of the diverse ecogeography of Peru and  
41 Ecuador in generating new, reproductively isolated populations, and enhance our understanding  
42 of the microevolutionary processes that lay a path to speciation.

## 43 **Introduction**

44 Heritable phenotypic variation, adaptation and reproductive isolation between populations  
45 are recognized as the primary drivers of speciation in evolutionary theory (Darwin, 1859; Reznick  
46 & Ricklefs, 2009; Harvey *et al.*, 2019). Thus, studying how new traits arise in populations is crucial  
47 to our understanding of the emergence of biological diversity. The advent of next-generation  
48 sequencing technologies allows integration of phylogenetic analysis and mechanistic studies of  
49 trait variation across populations, helping improve our understanding of microevolution (Harvey  
50 *et al.*, 2019). In this study, we utilized Restriction Associated Digestion Sequencing (RAD-seq)  
51 (Miller *et al.*, 2007; Baird *et al.*, 2008) in the wild tomato *Solanum habrochaites* – a species well-  
52 studied for its population-level diversity – to assess demography, defense metabolites and  
53 reproductive traits in an integrative manner.

54 *Solanum habrochaites* (Knapp & Spooner, 1999) is a phenotypically diverse species with  
55 a range from the upper reaches of the Atacama desert in southern Peru to the tropical forests of  
56 central Ecuador. Growing along the western Andes, this species is generally found 1000-3000  
57 meters above sea level (masl) but extends down to sea level in central Ecuador. This diversity in  
58 distribution and habitat may be at least partially responsible for the observed phenotypic diversity  
59 in this species, which is described below.

60 Previous studies (Gonzales-Vigil *et al.*, 2012; Kim *et al.*, 2012; Schillmiller *et al.*, 2015;  
61 Fan *et al.*, 2017) have demonstrated substantial population variation in two trichome-localized  
62 compound classes – acylsugars and terpenes – that are important for defense against herbivores  
63 (Weinhold & Baldwin, 2011; Leckie *et al.*, 2016). For example, *S. habrochaites* accessions were  
64 grouped into two chemotypic superclusters based on their acylsugar profiles – a “northern”  
65 supercluster that failed to add an acetyl (C2) group to the sucrose R2 position in acylsugars, and a  
66 “southern” supercluster that retained this activity (Kim *et al.*, 2012). This loss of C2 addition was  
67 a result of inactivation of acylsugar acyltransferase 4 (ASAT4), the final enzyme in the *Solanum*  
68 acylsugar biosynthetic pathway. This inactivation occurred via three different mechanisms – loss  
69 of gene expression, frameshift mutation and likely gene loss in different accessions. Using the  
70 same individuals sampled in this project, another study demonstrated differential acylation  
71 between northern and southern accessions on the furanose ring of the acylsugar, which could be  
72 traced back to gene duplication, divergence and loss in ASAT3, an upstream enzyme in the  
73 pathway (Schillmiller *et al.*, 2015). However, demographic processes that influenced this evolution  
74 of acylsugar profiles are not known.

75 *S. habrochaites* is also an attractive system for the study of reproductive trait evolution,  
76 with extensive diversity both in mating system and in reproductive barriers that affect gene flow  
77 between populations and between *S. habrochaites* and other tomato clade species. *S. habrochaites*  
78 is predominantly an obligate outcrossing species due to gametophytic S-RNase-based self-  
79 incompatibility (SI) (Mutschler & Liedl, 1994; Peralta *et al.*, 2008; Bedinger *et al.*, 2011). In this  
80 type of SI, the S-locus encodes pistil-expressed S-RNases and pollen-expressed S-locus F-box  
81 proteins that determine the specificity of the SI interaction. In addition, other pistil-expressed (e.g.,  
82 HT protein) and pollen-expressed (e.g. CUL1) factors that are not linked to the S-locus play a role  
83 in self pollen rejection [reviewed in (Bedinger *et al.*, 2017)]. SI is widespread in flowering plants,  
84 and acts to preserve genetic diversity and diminish inbreeding depression (Stebbins, 1957; Lande

85 & Schemske, 1985; Schemske & Lande, 1985; Takayama & Isogai, 2005; Igic *et al.*, 2008).  
86 However, there may be a selective advantage for transitions to self-compatibility (SC) during the  
87 dispersal of species, since a single SC individual could conceivably colonize a novel environment  
88 in the absence of other individuals or pollinators (Baker, 1955, 1967; Stebbins, 1957; Pannell *et*  
89 *al.*, 2015), which can set the stage for speciation (Allmon, 1992). SC *S. habrochaites* populations  
90 have arisen at the northern and southern species range margins (Martin, 1961; Rick *et al.*, 1979).  
91 These marginal SC populations, located in Ecuador and southern Peru, represent independent  
92 SI→SC transitions (Rick & Chetelat, 1991).

93         The populations at the northern species margin are of special interest, due to the diversity  
94 of reproductive barriers acting at the individual, population, and species levels (Martin, 1961; Broz  
95 *et al.*, 2017b). In previous work, two distinct SC groups (SC-1 and SC-2) associated with different  
96 *S-RNase* alleles as well as differences in inter-population and interspecies crossing barriers were  
97 identified at the northern species range margin (Broz *et al.*, 2017b). As *S. habrochaites* dispersed  
98 northward from its presumed site of origin in central Peru (Rick *et al.*, 1979; Peralta *et al.*, 2008;  
99 Pease *et al.*, 2016), it traversed the Amotape-Huancabamba Zone (AHZ), a region of cordillera  
100 disruption near the Ecuador-Peru border that constitutes a barrier to species dispersal (Sillitoe,  
101 1974; Weigend, 2004). The AHZ is bounded in the south by Río Chicama in Peru and in the north  
102 by Río Jubones in Ecuador (Weigend, 2002, 2004). A floristically diverse region called the  
103 Huancabamba Depression (HD) – coinciding with Río Huancabamba/Río Camaya/Río Marañón  
104 – is located in the central part of the AHZ in Peru (Weigend, 2002; Richter *et al.*, 2009). With its  
105 highly variable microhabitats, the AHZ acts as a biodiversity hotspot for both plants and animals  
106 (Berry, 1982; Weigend, 2002), and may have influenced *S. habrochaites* evolution.

107         To determine how both SI→SC transitions and acylsugar diversification occurred in the  
108 context of *S. habrochaites* range expansion, we first determined the species' population structure  
109 using RAD-seq and studied patterns of and barriers to gene flow between different populations.  
110 We identified four independent SI→SC transitions at the northern species margin associated with  
111 evolution of new acylsugar phenotypes. Our results revealed that alleles that eventually led to  
112 fixation of these novel phenotypes in Ecuador first emerged in the AHZ, during the northward  
113 migration of *S. habrochaites* from the Cajamarca region of Peru. We further observed the impact  
114 of geographical distance in central/southern Peru, producing locally isolated populations. This  
115 work underscores the critical role of ecogeography in shaping biological diversity.

## 116 **Materials and Methods**

117

### 118 ***Plant growth and sample collection for RAD-seq and biochemical analysis***

119 At Michigan State University, 52 accessions of *S. habrochaites* and 4 accessions of *S.*  
120 *pennellii* (LA1941, LA1809, LA1674, LA0716) (**File S1**, plus LA2868, LA1978) were sterilized  
121 with 10% trisodium phosphate, germinated on moist filter paper and transferred to peat pots where  
122 they were grown for 2 weeks under 16:8 light:dark conditions at 25°C/16°C respectively. Up to  
123 four replicates of two-week old plants were then transferred to soil (2 Sure mix + 1/2 sand) where  
124 they were grown prior to their harvest for 2 more weeks under the same long day conditions with  
125 regular watering.

126

### 127 ***Plant growth for reproductive phenotype analysis***

128 At Colorado State University, seeds were sterilized according to recommendations of the  
129 TGRC ('Tomato Genetics Resource Center') and were planted into 4-inch pots containing ProMix-  
130 BX soil (Premier Tech Horticulture, Quakertown, PA, USA) with 16:8 light:dark conditions  
131 26°C/18°C for 2 months. Plants were transplanted to outdoor agricultural fields at Colorado State  
132 University (May–September 2017) to obtain sufficient flowers for multiple crosses, and for  
133 collection of stylar tissue for immunoblotting analysis. For *S-RNase* allele analysis, plants were  
134 grown on a light shelf and a single young leaf was harvested from each plant for DNA preparation  
135 as previously described (Broz *et al.*, 2017b).

136

### 137 ***Library preparation and sequencing***

138 Leaf tissue from one of the sampled individuals per accession was used for DNA extraction  
139 using the Qiagen DNeasy kit (Qiagen, Valencia, CA, USA). Integrity of DNA was verified as a  
140 single high molecular weight band on a 1% agarose gel. Biological replicates were obtained for  
141 two accessions (LA2098, LA2976 [2x]) and technical replicates for 17 accessions (LA1928,  
142 LA1731, LA1778, LA2976, LA1777 [2x], LA2975, LA1986, LA1352, LA2155, LA1737,  
143 LA2175, LA2098, LA1252, LA2105, LA2861, LA0407, LA1625 [2x]). Four accessions of *S.*  
144 *pennellii* were selected for outgroup analysis (**File S1**) – bringing the total number of RAD-seq  
145 samples to 78. One hundred ng of the extracted DNA was used for library preparation and  
146 sequencing in two Illumina HiSeq 2000 lanes, as described previously (von Wettberg *et al.*, 2018).

147 Demultiplexed RAD-seq reads were deposited in NCBI Short Read Archive under the BioProject  
148 PRJNA623394.

149

### 150 ***RAD-seq data processing***

151 Overall, ~198 million 100-bp single end reads were obtained after standard Illumina quality  
152 filtering. We first converted the FASTQ reads from Illumina 1.5 encoding to Sanger encoding  
153 using the seqret tool of the EMBOSS v6.5.0 package, trimmed the reads using FASTX toolkit  
154 v0.0.14 to a Phred score >20 and selected only 100b reads. Since the first base of all reads, which  
155 constituted part of the barcode, was 'N', it was trimmed away. The ~187 million filtered reads  
156 were processed using the *process\_radtags.pl* script in the Stacks software v2.3d (Rochette *et al.*,  
157 2019) with the following parameter settings (*-b barcodes\_6b.tab -q -c -t 90 -E phred33 -D -w 0.20*  
158 *-s 10 --inline-null -e hindIII --adapter-1 ACACTCTTCCCTACACGACGCTCTTCCGATCT --*  
159 *adapter-mm 2 --len-limit 90*). Overall, 85.3% reads passed all quality filtering steps and were  
160 deemed high-quality (**File S1**). These reads were mapped to the *S. habrochaites* LYC4 genome  
161 (Aflitos *et al.*, 2014) using BWA MEM v0.7.17 (Li, 2013) with default parameters. Resulting SAM  
162 files were converted to BAM and sorted using Samtools v1.9 (Li *et al.*, 2009). Variant calling was  
163 performed with Stacks v2.3b using the default parameters for the reference-based mapping  
164 pipeline. Unfiltered SNPs were exported using the *populations* module with default parameters.  
165 Filtering of SNPs was performed with vcftools v0.1.15 (Danecek *et al.*, 2011) using the following  
166 parameters (*--max-missing 0.8 --min-meanDP 6 --max-meanDP 30 --maf 0.05 --mac 3*). All  
167 individuals had less than 50% missing loci, so none were removed. Heterozygosity and mean read  
168 depth were calculated for each sample in vcftools, which resulted in sample LA0716 being  
169 removed from downstream analyses due to higher than expected levels of heterozygosity. To make  
170 some downstream analyses easier to complete, linkage disequilibrium filtering was performed  
171 using plink v1.90b3.38 using 10 kb sliding windows and a  $r^2$  of 0.2 following a LD decay plot  
172 generated in PopLDdecay (Zhang *et al.*, 2019). Two VCF files, the filtered only and filtered with  
173 LD pruning, were imported back into Stacks to produce the necessary input files for downstream  
174 analyses and calculating F statistics ( $F_{st}$ ). Accession-wise details are provided in **File S1**.

175

176 ***Inference of ancestral population number***

177 Population structure was assessed with two different approaches — using inference of  
178 ancestral populations and using coalescent analyses. Ancestral population estimation was  
179 performed using three different datasets for increased robustness: **(Set 1)** We assessed 254,263  
180 SNPs using the R package LEA v2.4.0 (Frichot & François, 2015). STRUCTURE (Pritchard *et*  
181 *al.*, 2000) and ADMIXTURE (Alexander *et al.*, 2009) rely on simplified population genetic  
182 hypotheses such as the absence of genetic drift, as well as Hardy-Weinberg and linkage  
183 equilibrium in ancestral populations. LEA does not rely on the same assumptions and is more  
184 appropriate for inbred lineages (Frichot *et al.*, 2014) and was therefore used due to the high-levels  
185 of self-compatibility found in some populations of *S. habrochaites*. **(Set 2)** Set 1 was further  
186 filtered using LD pruning as described above to produce a total of 93,129 SNPs, and analyzed  
187 using LEA. **(Set 3)** A different run of Stacks was performed using Stacks v1.44, which allowed  
188 more granularity in parameter selection. The non-default parameters included (*-T 3 -m 5 -S --*  
189 *bound\_low 0 --bound\_high 0.02 --alpha 0.05*). The *populations* module in Stacks v1.44 was called  
190 with the following non-default parameters (*-t 3 -r 0.5 -m 5 --min\_maf 0.1 --lnl\_lim -6 --merge\_sites*  
191 *--write\_random\_snp*). This set contained 25,752 SNPs. For ancestral populations inference,  
192 analyses of K=2-15 were performed to determine the best K using the cross-entropy criterion  
193 (Frichot *et al.*, 2014), using an alpha value of 100, and 200 iterations. Principal Component  
194 Analysis (PCA) as implemented in SNPrelate v1.16.0 (Zheng *et al.*, 2012) was performed using  
195 Set 1 and 2 SNPs. Two PCAs were performed for each set: the full data set with all individuals  
196 included and one with the *S. pennellii* outgroups (LA1674, LA1809, and LA1941) removed.

197

198 ***Inference of population relatedness using coalescent analysis***

199 Coalescent analyses were performed with SNAPP as implemented in BEAST2 v2.4.5  
200 (Bouckaert *et al.*, 2014). Due to the computationally intense nature of SNAPP, the pruned SNP set  
201 was further pruned using vcftools by only including sites with no missing data and thinning SNPs  
202 to have a minimum of 50,000 bp between successive SNPs. This kept 3,965 SNPs. The resulting  
203 VCF file was then converted to a fasta file using vcf2phylip (Ortiz, 2019). The XML file was  
204 created using BEAUTi keeping each individual as unique species/populations. The mutation rate  
205 U and V were calculated from the data set with a coalescence rate set to 10. The MCMC was run  
206 for 8 million generations to achieve suitable ESS values (~449). Tree visualization was performed

207 with DensiTree (part of the Beast package) using a 25% burnin. The maximum clade credibility  
208 (MCC) was also identified with TreeAnnotator (part of the Beast package) using a 25% burnin.  
209 The tree allowed for classification of eight clades within the ingroup (plus the outgroup). These  
210 clades were then used for downstream analyses that required population specification. The MCC  
211 was then plotted on a map along with heterozygosity levels using the R package phytools v0.6.99  
212 (Revell, 2012).

213

#### 214 ***Other population genomic analyses***

215 Isolation by Distance analyses was performed using Mantel's test of correlation between  
216 the genetic and geographic distance matrices using Set 2 SNPs. The genepop file produced by  
217 Stacks was read into the R package adegenet v2.1.1 (Jombart, 2008; Jombart & Ahmed, 2011) as  
218 each accession being a unique population. Two sets of analyses were done: one with all the  
219 accessions found in the coalescent analysis (minus the outgroup) and a second set of analyses with  
220 samples split between northern and southern super-clusters as seen with the MCC plotted on a  
221 map. Both analyses used Euclidean distances and 100,000 permutations. To investigate historical  
222 migration patterns, TreeMix v1.13 (Pickrell & Pritchard, 2012) was used. Samples were separated  
223 into the eight categories identified by SNAPP plus the outgroup. Overall, zero to ten migration  
224 events were tested with a likelihood ratio test done to determine which migration events were  
225 significant (**Table S1**). Variance explained upon no migration and addition of individual migration  
226 events was obtained using the R function *get\_f* in Treemix.

227

#### 228 ***Identification of SNPs for Targeted Sanger Sequencing***

229 Analysis of reproductive traits identified populations of significant phenotypic interest that  
230 were not included in the original population genetic analysis. Thus, 15 accessions not included in  
231 the RAD-seq study (as well as three control accessions in the RAD-seq study) (**Table 1**) were  
232 analyzed using targeted Sanger sequencing (TSS) of 22 polymorphic loci, which were selected as  
233 follows: Since Stacks v2.x does not provide information about the breadth and coverage of  
234 individual SNPs, we used Stacks v1.44 to obtain SNP catalogs using **Set 3 SNPs** as described  
235 above. Custom Python scripts were used to identify 36 high-confidence polymorphic loci that were  
236 present across at least 50 out of 51 accessions, had a read coverage of >10X, and were not  
237 blacklisted by the *populations* module for STRUCTURE analysis. The broad coverage across



238 almost all accessions was intended to ensure most of them would be captured in any novel set of  
239 accessions using targeted sequencing. Twenty four of these 36 loci were randomly selected and  
240 using their genomic locations and 100 base regions on either side of the 100 base RAD-tag were  
241 extracted for primer design. Amplicons could be successfully obtained for 22 loci.

242

### 243 ***Targeted Sanger Sequencing for population structure***

244 An initial nucleotide BLAST was performed using the *LYC4* (Aflitos *et al.*, 2014) *S.*  
245 *habrochaites* assembly to identify sequences surrounding the polymorphic sequences for each of  
246 the 22 loci. Primers were designed to specifically amplify ~200 bp spanning the polymorphic  
247 regions of each locus, and the resulting PCR products were purified (Zymo, Irvine, CA), and  
248 sequenced (GENEWIZ, South Plainfield, NJ). For each of the 22 loci, sequences were aligned in  
249 MEGA7 (Kumar *et al.*, 2016) using Muscle (Edgar, 2004) with the original intended target, the  
250 corresponding sequence of LA0407 from the original RAD-seq dataset, and the top BLAST hits.

251 The diploid state of each locus of each accession was determined by aligning the sequences  
252 for all accessions, trimming off poor-quality sequences, and examining the set of trace files for  
253 each locus manually for heterozygous base calls (Chromas Pro,  
254 <https://technelysium.com.au/wp/chromaspro/>). If no ambiguous calls were present in the trace  
255 files, the individual was assumed to be homozygous at that locus.

256 To combine TSS and RAD-seq data, we performed BLAST between the trimmed Sanger  
257 sequences and the set of all 22 RAD loci consensus sequences to identify each corresponding  
258 RAD-seq locus. Sequences representing the 22 loci were extracted from the RAD-seq data (51  
259 samples) in the *populations* module of STACKS v1.46 using a selection of loci identified by  
260 BLAST. These sequences were combined with their targeted Sanger sequencing counterparts  
261 using custom scripts, aligned, manually inspected, and trimmed when necessary. PGDSpider  
262 v2.1.1.2 (Lischer & Excoffier, 2012) was used to call allele variants for each locus; the separate  
263 matrices generated by PGDSpider were then combined to create the STRUCTURE v2.3.4  
264 (Pritchard *et al.*, 2000) input matrix of allele variants for all 22 loci for the 69 total samples (15  
265 Sanger sequences from accessions not in the original experiment, 3 Sanger sequences from  
266 accessions included in the original RAD-seq dataset, and 51 sequences from the RAD-seq  
267 samples) using a custom Python script. STRUCTURE was run using default parameters with no  
268 prior population groups assumed for K=1-8 (three replicates per K) for 10,000 burn-in and 10,000

269 MCMC cycles. Results were extracted using STRUCTURE HARVESTER vA.2 July 2014 (Earl  
270 and von Holdt, 2011) and replicate runs were combined using CLUMPP v1.1 (Jakobsson &  
271 Rosenberg, 2007). All statistics (adegenet v1.7-15, pophelper v2.3.0), data analysis (pophelper),  
272 and plot generation (ggplot2, scatterpie) were performed using R v3.4.1 (Jombart & Ahmed, 2011;  
273 Francis, 2017).

274

### 275 **Identification of *S-RNase* allele *hab-7***

276 A previously published stylar transcriptome of SC accession LA2119 (Broz *et al.*, 2017a)  
277 was used as a BLAST database to discover potential *S-RNase* alleles (NCBI BioProject  
278 PRJNA310635). Using a set of known *S-RNase* gene sequences as BLASTn queries to the  
279 LA2119 assembly, a single putative *S-RNase* transcript sequence was recovered. Allele-specific  
280 primers were designed using this putative *S-RNase* sequence (**File S2**), and PCR was performed  
281 using genomic DNA from multiple LA2119 individuals. Amplicon sequencing verified the  
282 sequence identified by the transcriptome analysis and revealed the presence of a single intron in  
283 genomic DNA. Following the convention set by Covey *et al.* (2010), this *S-RNase* allele was  
284 dubbed *hab-7*. The transcript abundances of the *hab-7* allele in LA2119 styles and two different  
285 *S-RNase* alleles of SI *S. habrochaites* accession LA1777 were identified using data from a previous  
286 *S. habrochaites* transcriptome study (Broz *et al.*, 2017a).

287

### 288 **Reproductive trait analysis**

289 At least two genetically distinct individuals (each grown from a separate seed) of each  
290 accession were used for phenotyping. Mating system was determined for previously untested  
291 northern accessions (**Fig. S5**) and verified in an additional set of accessions using self-pollinations  
292 as previously described (Broz *et al.*, 2017b). If production of self-fruit was observed, plants were  
293 recorded as SC. If plants failed to set self-fruit using this approach, hand pollinations were  
294 performed, and/or pollen tube growth in styles was assessed as previously described (Covey *et al.*,  
295 2010). When at least three pollen tubes could be visualized at the base of the style or in the ovary  
296 in multiple independent crosses, plants were considered SC. When no self-fruit was formed and  
297 pollen tube tips could clearly be visualized terminating within the style, plants were considered SI.

298 To test for inter-population reproductive barriers as initially described by Martin (1961),  
299 hand pollinations were performed using *S. habrochaites* SC accession LA0407 (SC-2 group) as

300 male to test for the presence of pistil barriers that reject pollen of SC-2 plants and SI accession  
301 LA1777 as female to test for pollen resistance to S-RNase barriers as previously described (Broz  
302 *et al.*, 2017b). To test for interspecific reproductive barriers, pistils of *S. habrochaites* accessions  
303 were pollinated using *S. lycopersicum* cultivars VF36, M82 or LA1221 as males.

304 Expression of *S-RNase* and an additional pistil SI factor, HT-protein, was assessed in stylar  
305 extracts from at least 2 individuals using immunoblotting with anti-peptide antibodies specific to  
306 each protein as described previously (Covey *et al.*, 2010; Chalivendra *et al.*, 2013; Broz *et al.*,  
307 2017b). The presence or absence of specific *S-RNase* alleles was determined for at least three  
308 individuals from each accession. *S-RNase* alleles were amplified from genomic DNA of individual  
309 plants using allele-specific primers (**File S2**) in PCR reactions, as described previously (Broz *et*  
310 *al.*, 2017b). In selected accessions, the *HT* gene was amplified from genomic DNA using  
311 conserved gene specific primers (Covey *et al.*, 2010), PCR products were purified and subjected  
312 to Sanger sequencing.

313

#### 314 **Acylsugar sampling and MS data analysis**

315 Acylsugar sampling was performed from a single uniformly sized young leaflet of 2-3  
316 plants per accession for 40 of the 50 accessions as previously described (Fan *et al.*, 2016).  
317 Metabolites were analyzed on a Supelco Ascentis C18 column, using a Shimadzu Ultra High  
318 Performance Liquid Chromatograph (UHPLC) connected to a Waters Xevo quadrupole Time of  
319 Flight mass spectrometer (MS). Raw files were converted into ABF format using Reifycs Abf  
320 Converter (<https://www.reifycs.com/AbfConverter/>) and imported into MS-DIAL (Tsugawa *et al.*,  
321 2015) for preprocessing. Peaks with an amplitude >100 and with >2 data points were considered  
322 for further analysis. Mass slice width and sigma windows were set to 0.05 and 0.5, respectively.  
323 Peaks across all samples were aligned with a 0.05 min. retention time tolerance and 0.03 Daltons  
324 MS1 tolerance. Acylsugars were then selected and annotated from the alignment results based on  
325 manually identified acylsugar peaks, MS1 *m/z* values, MS/MS and previous results (Kim *et al.*,  
326 2012). A five-fold sample max/blank average filter was applied across the samples. Normalized  
327 and filtered data was then exported. Extracted peak areas were normalized by the internal standard  
328 peak areas per sample, and the normalized peak areas were averaged for each accession. Only  
329 peaks >2X internal standard peak area in >2 accessions were considered reliable signals.

330

## 331 **Results**

### 332 ***Preliminary analysis of RAD-seq data***

333 For RAD-seq, we selected 52 out of the >100 accessions of *S. habrochaites* in the TGRC  
334 germplasm database (<https://tgrc.ucdavis.edu/>) that span the entire species range. Four *S. pennellii*  
335 accessions were included as outgroups. As expected, there was large variation in the number of  
336 reads obtained per sample (**Fig. S1A**), ranging from 5707 to 5,348,246. After filtering the initial  
337 reads based on quality, one or both replicates of five accessions – LA2868, LA2976, LA1978,  
338 LA2098, LA0716 – were removed (**Fig. S1A**), still leaving 53 accessions of the two species for  
339 further analyses (**File S1**). We did not find any correspondence between number of reads between  
340 technical replicates (**Fig. S1B**) suggesting that the read number variation was due to the  
341 randomness associated with restriction cleavage and the RAD-seq library preparation protocol as  
342 opposed to within-species variation of restriction sites. To improve read coverage per accession,  
343 we combined reads from the technical replicates and mapped all reads to the draft-quality *S.*  
344 *habrochaites* LYC4 genome (Aflitos *et al.*, 2014) to make clustered read stacks (Catchen *et al.*,  
345 2013). The number of retained loci and mean coverage across all loci also varied across accessions  
346 (**Fig. S1C,D**). The median read coverage across all sites after filtering was 9.5, with 20 out of 53  
347 accessions having a mean read coverage  $\geq 10X$  (**Fig. S1D**).

348

### 349 ***Defining the population structure in *Solanum habrochaites****

350 To assess the genetic relatedness between *S. habrochaites* accessions across the range, we  
351 first inferred SNP-genotype based ancestral populations (K) using three different SNP datasets.  
352 These results suggested that the sampled *S. habrochaites* individuals arose from 4-6 ancestral  
353 populations (**Fig. 1; Fig. S2**) – three of which (*purple, red, yellow*) lie south of the AHZ. In the  
354 Ecuador, the optimal K=4 suggested presence of one ancestral *orange* population (**Fig. 1A,B**)  
355 while K=6 discriminated individuals in this region as originating from two different ancestral  
356 populations – *orange* and *green* – with different degrees of genotype sharing between them (**Fig.**  
357 **1D**). Manual observation of population assignments at multiple Ks (**Fig. S2**) as well as results of  
358 coalescent analysis (**Fig. 2A**), targeted Sanger sequencing (**Fig. 4**) and previous results using short  
359 sequence repeat markers (Sifres *et al.*, 2011), led us to assign six ancestral populations (**Fig. 1D**).  
360 We also observed that multiple accessions – at both K=4 and K=6 values – across the range had  
361 small yet non-negligible probabilities of being assigned to *yellow, red* and *purple* populations,  
362 south of the AHZ.

363 PCA using Set 1 and 2 markers (**Fig. 1C,F; Fig. S3**) showed a close relationship between  
364 accessions north of the HD, but interestingly in the south, the southernmost *purple* individuals  
365 were more related to *yellow* individuals near the central part of the range – near  
366 Huancabamba/Cajamarca – than to their geographically close *red* individuals. To better understand  
367 this observation, we employed a coalescent tree-based approach using SNAPP (Bryant *et al.*,  
368 2012), with 3965 markers represented in all *S. habrochaites* and *S. pennellii* accessions. This  
369 algorithm infers Bayesian trees for every SNP identified in the population and integrates for  
370 coalescence across all trees. Combined trees across all SNPs identified eight genotypically distinct  
371 population clusters within *S. habrochaites* (**Fig. 2A**), largely following the populations identified  
372 by LEA at K=6 (**Fig. 1D**). The two additional clusters 3 and 6 comprised of genotypic hybrids  
373 between the *green-orange* and *red-yellow* populations (**Fig. 1D**). Population clusters 1-4  
374 (supercluster 1; northern supercluster) correspond to samples from mid/southern Ecuador and  
375 northern Peru, while clusters 5-8 (supercluster 2; southern supercluster) correspond to samples  
376 across Peru (**Fig. 1F**). The two superclusters are separated at the HD, suggesting the geographical  
377 feature's role in modulating species dispersal. Unexpectedly, we also found that cluster 8 was not  
378 closely related to its geographical neighbor cluster 7 but was genetically equidistant from clusters  
379 5-7.

380 Taken together, the three methods suggest that there are eight current population clusters  
381 across the sampled *S. habrochaites* accessions, likely derived from 4-6 ancestral populations.  
382 Three clusters (clusters 6-8) remained robust to the different analyses performed, indicating that  
383 they are more genetically distinct. Cluster 8 – which was largely SC except for LA1298 (SI),  
384 LA1772 (SI), LA0094 (MP/SI) (see mating system analysis below) – was genetically equidistant  
385 and well-separated from clusters 5-7. Unexpectedly, the three SI accessions bore evidence of a  
386 shared genotype with the *yellow* and *red* populations. We explored three scenarios to explain this  
387 set of observations better. First, we speculated that the three accessions could be a result of  
388 hybridization between a SI *red/yellow* genotype male and a SC *purple* genotype female. Analysis  
389 of migration between populations using a phylogenetic co-variance-based approach (Pickrell &  
390 Pritchard, 2012) suggested presence of eight migration events (seven vs six events: D-statistic  
391 17.78, p-value=2.49e-05; eight vs seven events: D-statistic -3.76, p-value=1) (**Fig. 2B; Table S1**),  
392 of which one event is between clusters 5 and 8. However, evidence of such a migration would  
393 leave a significant footprint in the coalescent tree, which is not observed. Second, we asked

394 whether these three individuals represent an ancestral SI population from which the *yellow*, *red*  
395 and *purple* populations evolved. This scenario would result in clusters 5,6 being more closely  
396 related to clusters 3,4, which is not the case. Also, previous studies suggest *S. habrochaites* origin  
397 to be further north, near the AHZ (Rick *et al.*, 1979; Sifres *et al.*, 2011; Pease *et al.*, 2016). Thus,  
398 we explored a third scenario (**Fig. 6**). Here, cluster 8 would have been established by southward  
399 migration from near the AHZ (clusters 5,6), from founders possessing *red*, *yellow* and *purple*  
400 genotypes. Under this scenario, cluster 7 would result from an independent, local fixation of the  
401 *red* genotype. This hypothesis is supported by PCA, which suggests a closer relationship between  
402 cluster 8 and clusters 5,6 than with cluster 7 (**Fig. S3**) as well as by presence of small *red*, *yellow*  
403 and *purple* genotype probabilities in Ecuadorian accessions (**Fig. 1A,D**). Further analysis with  
404 fixation index also supported this model (see population differentiation section below). This  
405 scenario also allows for a rapid separation of the two superclusters via northward/southward  
406 migrations, as seen in the coalescent analysis (**Fig. 2A**). The third scenario is thus the most  
407 plausible, and also supports previous inferences of the origin of *S. habrochaites* after separation  
408 from *S. pennellii* near the Cajamarca/Huancabamba region (**Fig. S3**) (Rick *et al.*, 1979; Sifres *et*  
409 *al.*, 2011; Pease *et al.*, 2016). By studying acylsugar phenotypes below, we further define the origin  
410 as the Cajamarca region at the southern border of the AHZ.

411 After *S. habrochaites*-*S. pennellii* divergence, some *S. habrochaites* individuals migrated  
412 northwards through the river valleys of the AHZ. The drastic separation between the two  
413 superclusters at the HD (**Fig. 2A**) suggests that there has been little gene flow between them. We  
414 thus sought to assess the impact of HD and other barriers to gene flow across the species range.

415

#### 416 **Characterizing population differentiation in *S. habrochaites***

417 Three metrics were estimated – heterozygosity, fixation index ( $F_{st}$ ) and gene flow due to  
418 migration events. Overall, heterozygosity levels in *S. habrochaites* ranged from 0.02-0.17, while  
419 that in *S. pennellii* ranged from 0.02-0.07 (**Fig. S4**). Values for SI *S. pennellii* were lower than  
420 expected, possibly because two of the three accessions (LA1809 and LA1941) were collected at  
421 the extreme northern and southern species margins, respectively. As expected, *S. habrochaites* SC  
422 accessions had lower heterozygosity than SI accessions (**Fig. S4**). The observed heterozygosity  
423 across the range was substantially lower than the expected heterozygosity (**Fig. S4**), suggesting  
424 significant deviation from Hardy-Weinberg equilibrium, even in SI populations. This may be

425 expected given many SI/MP accessions lie in the AHZ. A previous study (Sifres *et al.*, 2011)  
426 concluded based on SSR markers that the highest heterozygosity existed among accessions from  
427 the Huancabamba and Cajamarca regions. We utilized the ecogeographic groups defined in that  
428 study to directly compare their heterozygosity with those from our RAD-seq data. Both the  
429 observed and expected heterozygosity values per accession were lower using RAD-seq than SSRs  
430 (**Fig. 3A**), a trend that has been observed previously (Sunde *et al.*, 2020). This may be due to the  
431 greater probability of identifying conserved restriction site linked markers in genome-wide RAD-  
432 seq studies as opposed to meaningful biological differences. Thus, the relative differences between  
433 populations are likely to be more important than specific values (Sunde *et al.*, 2020). Indeed, the  
434 trend observed between ecogeographic groups here was similar to the previous SSR study (Sifres  
435 *et al.*, 2011). The patterns of heterozygosity also correlated well with the mating systems – all  
436 Huancabamba, Cajamarca and Ancash accessions were SI/MP, and display higher levels of  
437 heterozygosity while the population extremes were SC with lower heterozygosity.

438  $F_{st}$  quantifies the degree of genetic variance between two populations that can be attributed  
439 to population structure, with values close to 0 indicating frequent inter-breeding and higher values  
440 indicating differentiation (Wright, 1931; Weir, 2012).  $F_{st}$  values ranged from 0.12 (clusters 5-6)  
441 to 0.51 (clusters 1-6) (**Fig. 3B**). Values between clusters 5/6-8 were substantially higher than that  
442 between clusters 7-8, supporting the model of the former clusters' relatedness as described above.  
443 Nevertheless, all  $F_{st}$  values were high enough to indicate barriers to unrestricted gene flow  
444 between populations. One of these barriers is the AHZ/HD, given the differentiation seen between  
445 the two superclusters at the HD and the low  $F_{st}$  of cluster 4, which lies in the heart of AHZ. In  
446 addition, when the  $F_{st}$  values were organized into a cladogram, the northern and southern  
447 superclusters again separate at the HD (**Fig. 3C**). Another barrier to gene flow is evolution of SC  
448 at the range extremes – the  $F_{st}$  cladogram (**Fig. 3C**) illustrates that the SC populations generally  
449 have higher branch lengths than SI populations they are closely related with. We also found that  
450 cluster 2, despite being SC, has substantial allelic similarity with SI cluster 3. In conjunction with  
451 results from coalescent and population structure analyses (**Figs. 1,2**), this pattern suggests that the  
452 SC cluster 2 may have emerged from the SI cluster 3.

453 The high  $F_{st}$  branch length of SI cluster 7 also led us to hypothesize that geographical  
454 distance acts as another barrier to species dispersal and connectivity, accounting for population  
455 differentiation in the southern part of the range. Isolation by Distance (IBD) analysis across the

456 entire range did not show a significant association between genetic and geographic distance when  
457 all the samples were included, with the observed association being -0.02 (Mantel's test  $p=0.77$ )  
458 (**Fig. 3D**). When northern and southern superclusters were analyzed separately, the northern  
459 accessions showed a slight positive yet non-significant association of 0.32 (Mantel's test  $p=0.06$ )  
460 (**Fig. 3E**), but the southern accessions – all south of the HD – showed a significant IBD with an  
461 observed association of 0.63 (Mantel's test  $p=0.001$ ) (**Fig. 3F**), supporting our hypothesis.  
462 Geographical distance, thus, is another barrier to gene flow between populations south of the HD.

463 Combined together, these results reveal the role of three important players in *S.*  
464 *habrochaites* population differentiation – the evolution of SC, AHZ/HD, and the large  
465 geographical distances south of the HD. We identified different migration events (**Fig. 2B**), but  
466 99.1% of the genetic variance between populations could be explained by phylogeny alone (**Table**  
467 **S1**), suggesting migration did not play a major role in population differentiation.

468 Cluster 4, close to the HD, was found to be unique, given that it is experiencing  
469 significantly restricted gene flow despite being SI. This pattern could be an outlier, being based on  
470 only three *bona fide* Huancabamba accessions (**Fig. 2A**), however, given the high endemism in  
471 the AHZ, it could also be a result of geographic barriers to dispersal. Genome-wide differentiation  
472 is also clearly seen in the SC populations. There is evidence of genotype sharing in some  
473 accessions mostly in the contact zones between the SC/SI clusters, likely as a result of shared  
474 ancestry (**Fig. 1A,D; Fig. 3B**). These results show that emergence of SC has clearly contributed to  
475 evolution of *S. habrochaites* diversity. We thus sought to characterize the mechanisms behind  
476 emergence of SC in this species.

477 .

#### 478 **Reproductive traits in *S. habrochaites* accessions**

479

480 *S. habrochaites* displays substantial diversity in the expression of reproductive traits  
481 including mating system, reproductive barriers between *S. habrochaites* populations and  
482 reproductive barriers between *S. habrochaites* and other tomato clade species. We combined new  
483 phenotyping results for ten Ecuadorian accessions (**Fig. S5**) with data from previous studies  
484 (Martin, 1961, 1963; Rick *et al.*, 1979; Mutschler & Liedl, 1994; Sacks & St. Clair, 1998; Covey  
485 *et al.*, 2010; Baek *et al.*, 2015; Markova *et al.*, 2016; Broz *et al.*, 2017b) (<https://tgrc.ucdavis.edu/>)  
486 to generate a comprehensive inventory of mating system and other reproductive traits throughout  
487 the *S. habrochaites* range (**Table 1**).



488 An SC mating system was confirmed for 19 accessions at the northern species margin in  
489 Ecuador (**Table 1**). In general, our results were congruent with previous reports (Rick *et al.*, 1979)  
490 or with mating systems designated by the TGRC (<https://tgrc.ucdavis.edu/>), with a few exceptions.  
491 The Ecuadorian accession LA2855, which had previously been designated as facultative SC, was  
492 found to contain both SI and SC individuals (now designated mixed population; MP). At the  
493 southern species range margin, accession LA0094 was also found to be MP (previously designated  
494 as SC), and accessions LA1753 and LA1560 were found to be SC rather than SI. In addition, we  
495 determined that all tested accessions in cluster 3 are MP, while those tested in cluster 2 are SC.

496 The pistil barrier/pollen resistance architecture of S-RNase-based gametophytic SI  
497 suggests that typically, SI will be lost due to mutations in pistil-expressed genes, e.g. due to loss  
498 of *S-RNase* and/or loss of *HT* expression in styles (Bedinger *et al.*, 2017). We assessed the  
499 expression of S-RNase and HT proteins in styler extracts using immunoblotting (**Table 1; Fig.**  
500 **S5B**). In general, S-RNase proteins were not detectable in styles of the northern SC accessions,  
501 congruent with previous reports (Broz *et al.*, 2017b). Surprisingly, one northern SC accession  
502 (PI251305) expressed S-RNase(s) in three of four individuals tested. All SI and MP accessions  
503 expressed S-RNases, as expected. The southern marginal SC accessions that were tested do express  
504 S-RNase protein, consistent with previous studies that identified a low-activity S-RNase (*hab-6*)  
505 in southern SC accession LA1927 (Covey *et al.*, 2010).

506 In several cases, SC could be correlated with specific *S-RNase* alleles (**Table 1**).  
507 Previously, three distinct SC groups (designated SC-1, SC-2 and SC-3) were identified at the  
508 northern range margin based on inter-population and interspecies crossing behavior (Broz *et al.*,  
509 2017b); two of which (SC-2 and SC-3) were associated with the presence of S-RNase allele  
510 *LhgSRN-1*, which is not expressed at the RNA or protein level (Kondo *et al.*, 2002; Covey *et al.*,  
511 2010; Broz *et al.*, 2017b). The *LhgSRN-1* allele was detected in nine northern SC accessions in  
512 western coastal to central mountainous regions of Ecuador (**Table 1**). The *LhgSRN-1* allele was  
513 also detected at a low frequency in several SI/MP accessions across the species range (LA2868,  
514 LA2099, LA1391, LA1353 and LA0094), suggesting that this “selfing allele” existed in the last  
515 common ancestral population of *S. habrochaites*, and was perhaps converted to an inactivated,  
516 non-expressed form in the AHZ during the species’ northward migration, before becoming fixed  
517 in the northern SC populations.

518 In this study, a new *S-RNase* allele (*hab-7*) was identified using stylar transcriptomic data  
519 from the SC-1 group accession LA2119 (Broz *et al.*, 2017b,a). The *hab-7* allele (**Fig. S6**) appears  
520 to be a bona fide *S-RNase* allele, since it contains conserved features of all S-RNases including a  
521 predicted single intron, and a deduced amino acid sequence that harbors a secretory signal peptide,  
522 two catalytic histidine residues and the conserved C1-C5 motifs. In addition, the *hab-7* allele lacks  
523 sequences associated with non-S-locus S-like RNases (Vieira *et al.*, 2008). Further, the *hab-7*  
524 protein shares >99% identity with the available coding region of *S. peruvianum* S13-RNase  
525 (Chung *et al.*, 1994) (GenBank: BAA04147.1). Expression of the *hab-7* allele in styles of SC  
526 accession LA2119 was 400-1200-fold lower than that of two different *S-RNase* alleles in styles of  
527 SI accession LA1777 (FPKM = 12.25 for *hab-7* in LA2119 versus 4604.90 and 14579.88 for the  
528 two S-RNases in LA1777). We found the *hab-7* allele in all known SC-1 group accessions and six  
529 geographically close accessions (**Table 1, Fig. 5**).

530 A low activity S-RNase *hab-6* was previously identified in southern SC accession LA1927  
531 (Covey *et al.*, 2010). We found the *hab-6 S-RNase* allele in all SC accessions tested at the southern  
532 *S. habrochaites* species margin (designated as SC-4).

533 Expression of HT protein – a pistil-specific factor not encoded at the *S* locus that functions  
534 both in SI and in interspecific pollen tube rejection (McClure *et al.*, 1999; Tovar-Méndez *et al.*,  
535 2014; Tovar-Méndez *et al.*, 2017) – was also assessed by immunoblotting. HT protein is expressed  
536 in styles of all tested accessions except for three from central Ecuador (LA1223, PI390515 and  
537 PI251305) and one from southern Peru (LA1691). PCR amplification and sequencing of the HT-  
538 A gene demonstrated that the three Ecuadorian accessions all have the same nonsense mutation in  
539 the second exon of the gene (**Fig. S7**).

540 Unidirectional inter-population barriers between the northernmost SC and southernmost  
541 SC populations and between the extreme marginal SC and central SI populations have been  
542 documented in *S. habrochaites* (Martin, 1963; Rick & Chetelat, 1991; Markova *et al.*, 2016; Broz  
543 *et al.*, 2017b). We tested for pollen-side inter-population reproductive barriers by imaging growth  
544 of pollen tubes from different accessions in pistils of a well-characterized SI accession (LA1777)  
545 and found that, among our newly tested SC accessions, only LA4656 displays a pollen-side  
546 population barrier and thus exhibits all reproductive traits associated with the SC-2 group (**Fig.**  
547 **S5, Table 1**). To assess pistil-side inter-population barriers, we tested growth of pollen tubes of a  
548 well-characterized SC-2 accession (LA0407) in pistils of the new accessions. We found that all

549 accessions (either SI or SC) that express any S-RNase protein rejected LA0407 pollen and thus  
550 possessed pistil-side inter-population barriers (Broz *et al.*, 2017b) (**Fig. S5, Table 1**).

551 Finally, the presence or absence of interspecific reproductive barriers was assessed by  
552 examining the growth of interspecific pollen tubes in styles (**Fig. S5B**). We tested for this trait  
553 using pollen from the cultivated tomato species *S. lycopersicum*, which is rejected in styles of wild  
554 tomato species that produce green fruits, including *S. habrochaites* (Baek *et al.*, 2015). Most *S.*  
555 *habrochaites* accessions possess interspecific reproductive barriers, i.e. their styles reject pollen  
556 tubes of *S. lycopersicum*, but a previous study found a single accession (LA1223) that lacked this  
557 ability (Broz *et al.*, 2017b). This accession also lacked expression of HT protein, did not reject  
558 pollen of SC-2 accessions and contained the *LhgSRN-1* S-RNase allele. This combination of traits  
559 was denoted as SC-3 (Broz *et al.*, 2017b). In this study, we found only one additional SC  
560 accession, PI390515, which exhibited all of these traits and can be classified as a SC-3 group  
561 member (**Table 1, Fig. S5**).

562

#### 563 **Population identification of newly sampled accessions**

564 Analysis of reproductive traits identified accessions of significant phenotypic interest that  
565 were not included in the RAD-seq population genetic study. To identify their ancestral populations,  
566 we utilized Targeted Sanger Sequencing (TSS) of 22 broadly represented and high coverage RAD-  
567 seq polymorphic loci. When the TSS and RAD-seq data for the 22 loci were combined and  
568 analyzed, seven ancestral populations could be identified that corresponded closely with  
569 reproductive characters (**Fig. 4A**). One cluster identified using combined RAD-seq and TSS data  
570 (*orange*) corresponds to the coalescent cluster 1 (**Fig. 2A**) and includes accessions found along a  
571 steep altitudinal cline in central Ecuador (**Fig. 4**). These accessions contain, or segregate for, the  
572 *Lhg-SRNI* allele found in the SC-2 and SC-3 groups (**Table 1**). Notably, the northernmost SI  
573 accession in Ecuador, LA2868, which contains the *LhgSRN-1* S-RNase allele at a low frequency  
574 (**Table 1**) also clusters with this group, and may represent an ancestral SI population. Another  
575 distinct cluster identified (*green*; **Fig. 4A**) includes SC accessions found in mountainous south-  
576 central Ecuador centered around Loja (**Fig 4B**). These accessions all contain the low-expression  
577 *hab-7* S-RNase allele. The accessions in this cluster that have been fully phenotyped for  
578 reproductive traits (Broz *et al.*, 2017b) (**Table 1, Fig. S5**) lack inter-population reproductive

579 barriers and exhibit interspecific barriers, consistent with a designation of SC-1 (Broz *et al.*, 2017b)  
580 **Fig. S5**). These SC-1 accessions all appear in coalescent cluster 2 in northeastern Loja (**Fig. S9**).

581 Unexpectedly, our *S-RNase* allele and *HT* expression data suggested that hybridization has  
582 occurred between the SC-1 and SC-2/3 groups, which overlap in a mountainous region near the  
583 town of Alausí (**Table 1, Fig. 4**). Specifically, two accessions collected in this region (PI251305  
584 and LA2144) include individuals containing either the *hab-7* or the *LhgSRN-1* alleles, or both.  
585 This result is corroborated by the full RAD-seq data for LA1223, an accession from the same  
586 region, where genetic relatedness to both northern and central Ecuador populations was seen using  
587 the filtered set of ~95K markers (**Fig. 1D**).

588 Two SC accessions collected west of the town of Gíron in central Ecuador LA4654 and  
589 LA4655 (**Fig. 4B**), share a unique polymorphism pattern in the TSS analysis (**Fig. 4A**,  
590 *red/green/orange*). These accessions contain neither the *LghSRN-1* or the *hab-7 S-RNase* alleles,  
591 so *S-RNase* allele(s) are considered “Unknown” (**Fig. 4A, Table 1**), and these accessions were  
592 tentatively designated as an “SC-6” group. These accessions lack inter-population barriers but  
593 retain interspecific barriers (**Table 1, Fig. S5**).

594 Another cluster (*blue*, **Fig 4A**) contains SI and MP accessions as well as SC accessions  
595 with neither the *LghSRN-1* nor the *hab-7 S-RNase* allele (allele unknown, **Table 1**) and do not  
596 cluster with other SC types. Therefore, SC accessions in this cluster were tentatively designated as  
597 “SC-5” type. In the broader coalescent analysis with ~95K markers, this cluster appeared as a  
598 hybrid between *orange* and *green* genotypes (**Fig. 1D**), but is resolved into an independent  
599 population with 22 markers. The co-clustering of SC, MP and SI accessions in the *blue* cluster  
600 suggests that the emergence of distinct SC-5 and MP groups in southwest Ecuador region (**Fig 4B**)  
601 is recent enough that only moderate genetic differentiation has occurred between these groups and  
602 their SI progenitors.

603 In southern Peru, the SC-4 group with the *hab-6 S-RNase* allele (Covey *et al.*, 2010)  
604 clusters with two SI accessions (LA1772 and LA1298) and one MP accession (LA0094) from the  
605 same region (**Fig. 4A, purple**). Given the finding of isolation by distance in supercluster 2, the  
606 emergence of the SC-4 group could have occurred from an MP type population (e.g. similar to  
607 LA0094) as a result of selection for reproductive assurance as the species migrated southward.  
608 This inference is supported by the coalescent analysis (**Fig. 2A**), which shows LA0094 as more  
609 closely related to the SC accessions further south than other SI accessions in cluster 8.

610

611 **Evolution of acylsugar diversity in *S. habrochaites***

612 Results described above demonstrate the genetic differentiation between northern and  
613 southern population clusters brought about by multiple SI→SC transitions and presence of the  
614 AHZ. Previous studies also identified differences in acylsugar profiles from different *S.*  
615 *habrochaites* accessions. One study (Kim *et al.*, 2012) assessed the enzyme ASAT4 – the last  
616 enzyme in the acylsugar biosynthetic pathway – which was found to be inactivated in many  
617 northern accessions resulting in loss of acylsugar acetylation (**Figs. S8, S9**). We re-analyzed this  
618 result in the context of population structure. As *S. habrochaites* sampled in this study were  
619 obtained from the stock center independently of the previous study, we re-sampled the leaf surface  
620 acylsugars from 2-3 replicates of 40/51 accessions used for RAD-seq. In two publications (Kim *et*  
621 *al.*, 2012; Schillmiller *et al.*, 2015), LA1362, LA2409 and LA2650 had been identified as  
622 chemotypic outliers in their geographical area i.e. their acylsugar phenotype matched not with their  
623 neighbors but with accessions very distant from their documented geographical area. We found  
624 that all three accessions were also genotypic outliers in their recorded geographic area (**Fig. 1, Fig.**  
625 **2A**). However, while LA2409 and LA2650 chemotypes matched previous results and their “true”  
626 geographic area based on their genotype, LA1362 profile did not appear as a chemotypic outlier  
627 in this study (**Fig. 5**), the reasons for which are not currently clear.

628 Loss of acetylation in the north was previously found to occur via three different  
629 mechanisms – loss of *ASAT4* gene expression (chemotype E), frameshift mutation in *ASAT4*  
630 (chemotype D) and likely loss of the *ASAT4* gene (chemotype C) (Kim *et al.*, 2012). Mapping  
631 these chemotypes onto the SI/SC definitions revealed that chemotypes C and D were confined to  
632 the northernmost SC clusters 1-6 (except SC-4, which is southern Peru), and chemotype E was  
633 widespread across SI/MP accessions abruptly limited by the southern boundary of the AHZ (**Fig.**  
634 **5; Fig. S9**). The two chemotypes A and B with acetylating, functional versions of ASAT4 –  
635 representing the ancestral ASAT4 activity – were associated with clusters 7 and 8. The  
636 northernmost accession with a functional *ASAT4* allele (LA2329) lies in the Cajamarca region  
637 south of the AHZ. This finding further supports the model of origination of *S. habrochaites* in the  
638 Cajamarca region, and thereby implies that the functional *ASAT4* allele was inactivated during the  
639 northward migration into the AHZ (**Fig. 6**).

640 One hypothesis for why ASAT4 became inactivated concerns ASAT3, an upstream  
641 enzyme in the acylsugar biosynthetic pathway (**Fig. S8**). This enzyme was studied previously using  
642 the same individual plants sampled here for RAD-seq (Schillmiller *et al.*, 2015), where it was found  
643 that southern accessions had long (>12-carbon) acyl chains on the furanose ring of the sugar  
644 molecule (**black squares, Fig. 5**) while this furanose ring acylation was lost in the northern  
645 accessions (**red circles, Fig. 5**). This loss-of-function was associated with loss of the *ASAT3-F*  
646 (furanose-ring acylating) duplicate and retention of the *ASAT3-P* (pyranose-ring acylating)  
647 duplicate copy of *ASAT3*. Only *ASAT3-P* largely remained in the northern accessions, and this  
648 enzyme acylates the same position on the sugar molecule as the ASAT4 enzyme (**Fig. S8**). These  
649 observations led us to hypothesize that ASAT3-P acylation of this site led *ASAT4* to accumulate  
650 mutations via drift.

651 Re-assessed in the context of population structure, the loss of furanose-ring acylation was  
652 seen only in the AHZ in clusters 1-5, while clusters 6-8 had acylsugars with furanose-ring  
653 acylation. As ASAT3 duplication is predicted to have occurred prior to *S. habrochaites-S.pennellii*  
654 split (Schillmiller *et al.*, 2015), presence of active ASAT3-P and -F in cluster 6 (LA1352) provides  
655 further support for the origin of *S. habrochaites* near the AHZ southern boundary, where this  
656 cluster is located. With the limited data available so far, *ASAT4* inactivation (chemotype E) is seen  
657 to have a wider geographic spread than loss of furanose-ring acylation (red circles, **Fig. 5**),  
658 suggesting that the two losses occurred independently. However, a deeper genetic and  
659 metabolomic sampling of clusters 5, 6 and accessions in cluster 7 close to the southern boundary  
660 of the AHZ will need to be performed to better resolve gene loss and gene flow in this geographical  
661 area.

## 662 **Discussion**

663 In this study, we explored the genetic, reproductive and metabolic diversification of *S.*  
664 *habrochaites* in the context of population structure defined using genome-wide RAD-seq markers.  
665 The RAD-seq results provide a less biased estimation of population structure than a previous  
666 analysis based on fewer AFLP and SSR markers (Sifres *et al.*, 2011), which also tend to be faster  
667 evolving than genome-wide SNP loci (Sunde *et al.*, 2020). Our results show eight different  
668 population clusters across the species range, which have been substantially influenced by  
669 variations in geography. The Ecuadorian accessions lie in areas that range from densely forested  
670 mountains with high precipitation to either dry or wet coastal regions. On the other hand,

671 accessions south of the AHZ in Peru are often confined to isolated river valleys and experience  
672 more uniform environments with regard to altitude and temperature fluctuations. The diverse biotic  
673 and abiotic interactions and geographical features are associated with a range of metabolic and  
674 reproductive phenotypes in this species (Rick *et al.*, 1979; Sacks & St. Clair, 1998; ten Have *et al.*,  
675 2007; Finkers *et al.*, 2007; Gonzales-Vigil *et al.*, 2012; Kim *et al.*, 2012; Arms *et al.*, 2015;  
676 Schillmiller *et al.*, 2015; Markova *et al.*, 2016; Broz *et al.*, 2017b; Kilambi *et al.*, 2017; Fan *et al.*,  
677 2017), some of which we assessed here.

678 Previous studies (Rick *et al.*, 1979; Sifres *et al.*, 2011; Pease *et al.*, 2016) have variously placed  
679 the origin of *S. habrochaites* in the Huancabamba, Cajamarca or Ancash regions. Here, using  
680 findings from multiple genetic analyses and acylsugar genotypes, we infer that the Cajamarca  
681 region near the southern boundary of the AHZ is likely the region of *S. habrochaites* origination,  
682 supporting Rick *et al.*, (1979). Two lineages, representing the two superclusters, then moved north  
683 and south from this region to establish the current species range (**Fig. 6**). Accessions south of the  
684 HD are divided into four distinct clusters 5-8. The differentiation between these clusters may have  
685 been driven primarily through isolation by distance (**Fig. 3F**). In contrast, north of the HD,  
686 multiple SC populations arose as the species migrated through the AHZ into Ecuador (**Fig. 4B**,  
687 **Table 1**). Migration through the AHZ and its array of microhabitats may have led to selection for  
688 an SC mating system or its fixation due to drift. Limiting mates/pollinators, novel herbivores  
689 and/or different temperature/precipitation may have contributed to this evolution. Determining the  
690 specific nature of selective pressures experienced in the southern and northern boundaries and in  
691 the HD is an interesting research problem that needs to be studied in greater detail. It is noteworthy  
692 that the only other tomato clade species on both sides of the AHZ – *S. pimpinellifolium*, *S. neorickii*  
693 – are SC, suggesting that this mating system may be essential for or facilitated by successful  
694 migration through the fragmented microhabitats in the AHZ.

695 As *S. habrochaites* moved through the AHZ, it also accumulated a mutation that led to loss of  
696 expression of the *ASAT4* gene involved in acylsugar biosynthesis. Our sampling suggests this  
697 expression-inactivated allele is completely restricted to the SI/MP accessions of the AHZ (**Fig. 5**;  
698 **Fig. S9**). We postulate that this mutation may be an epigenetic modification, since the expression  
699 of the allele is seen restored in cluster 2 SC accessions, although *ASAT4* is still inactivated by a  
700 new frameshift mutation. It is possible that the association between cluster 2 SC and *ASAT4*  
701 inactivation via frameshift is a causative one, in that the emergence of SC in cluster 2 led to rapid

702 fixation of the frameshifted *ASAT4* allele. The fixation of *ASAT4* inactivation in supercluster 1  
703 accessions may also have been accelerated by parallel dynamics occurring at the locus encoding  
704 ASAT3, which is upstream in the pathway (**Fig. S8**) creating an epistatic conflict.

705 Our population structure results and reproductive analyses suggest potential progenitor-  
706 descendant relationships between SI and SC populations at both the northern and southern species  
707 margins. Given some of the reproductive barriers are uni-directional, there is still potential for  
708 continued gene flow between ancestral SI and derivative SC groups. For example, in the case of  
709 the SC-2 and the southern SC-4 groups, the loss of pollen SI factors creates a unidirectional inter-  
710 population barrier that would prohibit gene flow between SC-2/4 males and progenitor SI females  
711 (Markova *et al.*, 2016; Broz *et al.*, 2017b). In theory, this gene flow could partially rescue SC  
712 populations from the evolutionary “dead end” imposed by the mutational loss of SI (Stebbins,  
713 1957; Takebayashi & Morrell, 2001; Igic & Busch, 2013). On the other hand, this partial  
714 reproductive barrier can still promote diversification between populations and may represent  
715 incipient speciation in *S. habrochaites* at its species margin.

716 Modern evolutionary synthesis recognizes three modes of speciation: allopatric, parapatric  
717 and sympatric, of which allopatric speciation – where reproductive isolation between populations  
718 of the same species is driven by geographical barriers (vicariance) – is considered the most  
719 common (Allmon, 1992; Howard, 2003). While not serving as a direct cause of vicariant allopatry  
720 (Howard, 2003), the AHZ, and especially the HD, appear to have sufficiently destabilized *S.*  
721 *habrochaites* for both reproductive behavior and acylsugar biosynthesis during its northwards  
722 migration and set the stage for future reproductive isolation. Evolution of such phenotypic  
723 diversity and reproductive isolation sets these populations on a path to forming new species  
724 (Allmon, 1992; Howard, 2003). Overall, our findings present a high-resolution view of the micro-  
725 evolutionary processes occurring in *S. habrochaites* and provide greater insights into the  
726 mechanisms that generate biological diversity.

727

## 728 **Acknowledgments**

729 We thank the C. M. Rick Tomato Genetics Resource Center for seeds. GM, RL, PAB  
730 conceived the study. GM, JL, CM, AKB, AAB, DC, NC, PAB performed the analysis. Everyone  
731 contributed to writing and reviewing the manuscript. We thank Dr. A. Tovar-Mendez for providing  
732 some of the HT immunoblot results and Nicole Irace for help with pollen tube imaging. This work



733 was supported by grant MCB-1127059 to PAB from the NSF Plant Genome Research Program.  
734 JL was supported by the NSF Plant Genome Postdoctoral Fellowship 1711807. GM was supported  
735 by IOS-1546617 and IOS-1025636 to RL from the NSF Plant Genome Research Program, and by  
736 Cornell University startup funds. AAB was supported by startup funds from Cornell University.  
737  
738

739 **Tables**

740

741 **Table 1: Reproductive traits for *S. habrochaites* accessions.** Reproductive traits documented  
 742 for each accession include mating system as detected by fruit production after self-pollination  
 743 and/or pollen tube growth analysis (SC = self-compatible, SI = self-incompatible); expression of  
 744 S-RNase protein as detected by immunoblotting; *S-RNase* allele as detected by allele-specific PCR  
 745 with at least three individuals in each accession; presence of HT protein as detected by  
 746 immunoblotting; pollen-side interpopulation reproductive barriers as detected by pollen tube  
 747 growth in crosses with pollen from different accessions onto pistils of SI accession LA1777 (Y =  
 748 pollen tubes rejected, N = pollen tubes accepted); pistil-side interpopulation barriers as detected  
 749 by pollen tube growth with pollen of SC accession LA0407 onto pistils of different accessions (Y  
 750 = pollen rejected, N = pollen accepted); inter-specific unilateral incompatibility (UI) detected by  
 751 pollen tube growth in crosses using cultivar (*S. lycopersicum*) pollen onto pistils of different  
 752 accessions (Y = pollen tubes rejected, N = pollen tubes accepted); and SC type based on the  
 753 combination of reproductive traits and S-RNase allele present. \*Data from Broz et al., 2017, ^Data  
 754 from Covey et al., 2010, #Data from Markova et al., 2016, ^presence of *LhgSRN-1* allele detected  
 755 at a low frequency, nt = not tested, na = not applicable because accession is SI. Unshaded portion  
 756 of the Table shows accessions from Ecuador and shaded portion of the Table shows accessions  
 757 from Peru.

758

| Accession          | Mating System | S-RNase protein | <i>S-RNase</i> Allele(s)   | HT protein | Inter-pop pollen-side | Inter-pop pistil-side | UI | SC type |
|--------------------|---------------|-----------------|----------------------------|------------|-----------------------|-----------------------|----|---------|
| LA4656/<br>ECU1498 | SC            | N               | <i>LhgSRN-1</i>            | Y          | Y                     | N                     | Y  | 2       |
| LA1624*            | SC            | N               | <i>LhgSRN-1</i>            | Y          | Y                     | N                     | Y  | 2       |
| PI129157*          | SC            | N               | <i>LhgSRN-1</i>            | Y          | Y                     | N                     | Y  | 2       |
| LA1625*            | SC            | N               | <i>LhgSRN-1</i>            | Y          | Y                     | N                     | Y  | 2       |
| LA1266*            | SC            | N               | <i>hab-7</i>               | Y          | N                     | N                     | Y  | 1       |
| PI134417           | SC            | N               | <i>LhgSRN-1</i>            | Y          | Y#                    | N                     | nt | 2       |
| LA1264*            | SC            | N               | <i>hab-7</i>               | Y          | N                     | N                     | Y  | 1       |
| PI390515           | SC            | N               | <i>LhgSRN-1</i>            | N          | Y                     | N                     | N  | 3       |
| LA0407*            | SC            | N               | <i>LhgSRN-1</i>            | Y          | Y                     | N                     | Y  | 2       |
| LA1223*            | SC            | N               | <i>LhgSRN-1</i>            | N          | N                     | N                     | N  | 3       |
| PI251305           | SC            | Y               | <i>hab-7/<br/>LhgSRN-1</i> | N          | N                     | Y                     | Y  | 1       |
| LA4654/<br>ECU434  | SC            | N               | Unknown                    | Y          | N                     | N                     | Y  | 6       |
| LA4655/<br>ECU436  | SC            | N               | Unknown                    | N          | N                     | N                     | Y  | 6       |
| LA2119*            | SC            | N               | <i>hab-7</i>               | Y          | N                     | N                     | Y  | 1       |

|                      |    |   |                                           |   |   |    |    |    |
|----------------------|----|---|-------------------------------------------|---|---|----|----|----|
| LA2868*              | SI | Y | Multiple <sup>a</sup>                     | Y | N | Y  | Y  | na |
| LA2128               | SC | N | <i>hab-7</i>                              | Y | N | N  | Y  | 1  |
| LA1252               | SC | N | <i>hab-7</i>                              | Y | N | N  | Y  | 1  |
| LA2855               | MP | Y | Multiple                                  | Y | N | Y  | Y  | na |
| LA2106*              | SC | N | <i>hab-7</i>                              | Y | N | N  | Y  | 1  |
| LA2101*              | SC | N | Unknown                                   | Y | N | N  | Y  | 5  |
| LA2860               | SC | N | Unknown                                   | Y | N | N  | Y  | 5  |
| LA2864*              | SI | Y | Multiple                                  | Y | N | Y  | Y  | na |
| LA2099*              | MP | Y | Multiple <sup>a</sup>                     | Y | N | Y  | Y  | na |
| LA2098*              | MP | Y | Multiple                                  | Y | N | Y  | Y  | na |
| LA2175*              | MP | Y | Multiple                                  | Y | N | Y  | Y  | na |
| LA1391*              | MP | Y | Multiple <sup>a</sup>                     | Y | N | Y  | Y  | na |
| LA2314*              | SI | Y | Multiple                                  | Y | N | Y  | Y  | na |
| LA1353* <sup>^</sup> | SI | Y | Multiple                                  | Y | N | Y  | Y  | na |
| LA1777* <sup>^</sup> | SI | Y | Multiple                                  | Y | N | Y  | Y  | na |
| LA0094               | MP | Y | Multiple <sup>a</sup><br>inc <i>hab-6</i> | Y | N | Y  | Y  | na |
| LA1691               | SC | Y | <i>hab-6</i>                              | N | N | nt | Y  | 4  |
| LA1681               | SC | Y | <i>hab-6</i>                              | Y | N | nt | nt | 4  |
| LA1721               | SC | Y | <i>hab-6</i>                              | Y | N | Y  | nt | 4  |
| LA1927 <sup>^</sup>  | SC | Y | <i>hab-6</i>                              | Y | Y | Y  | Y  | 4  |

759

760 **Supplementary Tables**

761

762 **Table S1: TreeMix analysis results.** The log likelihood ratio of having zero to ten migration  
763 events between the eight coalescent clusters is shown.

764

| Allowed Migration Events | Log likelihood | LRT (D statistic and p-value) | % variance explained |
|--------------------------|----------------|-------------------------------|----------------------|
| 0                        | -589.27        | --                            | 0.991034             |
| 1                        | 57.81          | 1294.15 (2.11e-283)           | 0.997558             |
| 2                        | 114.99         | 114.37 (1.08e-26)             | 0.998156             |
| 3                        | 241.72         | 252.46 (4.57e-57)             | 0.9992747            |
| 4                        | 265.97         | 48.49 (3.32e-12)              | 0.9994937            |
| 5                        | 285.60         | 39.28 (3.68e-10)              | 0.999637             |
| 6                        | 302.82         | 34.43 (4.42e-09)              | 0.9998275            |
| 7                        | 311.70         | 17.78 (2.49e-05)              | 0.9999293            |
| 8                        | 309.87         | -3.76 (1)                     | 0.9999032            |
| 9                        | 314.70         |                               | 0.9999473            |
| 10                       | 319.57         |                               | 0.9999369            |

765

766

767

768 **Supplementary Files**

769 **File S1:** Descriptive statistics of accessions, RAD-seq data and their association with other traits  
770 assayed in this study. T/B stands for technical or biological replicates.

771

772 **File S2:** Primers used for Targeted Sanger sequencing and for S-RNase and HT allele  
773 identification

774 **References**

- 775 **Aflitos S, Schijlen E, de Jong H, de Ridder D, Smit S, Finkers R, Wang J, Zhang G, Li N,**  
776 **Mao L, et al. 2014.** Exploring genetic variation in the tomato (*Solanum* section *Lycopersicon*)  
777 clade by whole-genome sequencing. *The Plant Journal* **80**: 136–148.
- 778 **Alexander DH, Novembre J, Lange K. 2009.** Fast model-based estimation of ancestry in  
779 unrelated individuals. *Genome Research* **19**: 1655–1664.
- 780 **Allmon W. 1992.** A causal analysis of stages in allopatric speciation. In: Futuyma D, Antonovics  
781 J, eds. *Oxford Surveys in Evolutionary Biology*. Oxford University Press.
- 782 **Arms EM, Bloom AJ, St. Clair DA. 2015.** High-resolution mapping of a major effect QTL  
783 from wild tomato *Solanum habrochaites* that influences water relations under root chilling. *TAG.*  
784 *Theoretical and Applied Genetics. Theoretische Und Angewandte Genetik* **128**: 1713–1724.
- 785 **Baek YS, Covey PA, Petersen JJ, Chetelat RT, McClure B, Bedinger PA. 2015.** Testing the  
786 SI × SC rule: Pollen–pistil interactions in interspecific crosses between members of the tomato  
787 clade (*Solanum* section *Lycopersicon*, Solanaceae). *American Journal of Botany* **102**: 302–311.
- 788 **Baird NA, Etter PD, Atwood TS, Currey MC, Shiver AL, Lewis ZA, Selker EU, Cresko**  
789 **WA, Johnson EA. 2008.** Rapid SNP discovery and genetic mapping using sequenced RAD  
790 markers. *PLoS ONE* **3**.
- 791 **Baker HG. 1955.** Self-Compatibility and Establishment After “Long-Distance” Dispersal.  
792 *Evolution* **9**: 347–349.
- 793 **Baker HG. 1967.** Support for Baker’s Law—as a Rule. *Evolution* **21**: 853–856.
- 794 **Bedinger PA, Broz AK, Tovar-Mendez A, McClure B. 2017.** Pollen-Pistil Interactions and  
795 Their Role in Mate Selection. *Plant Physiology* **173**: 79–90.
- 796 **Bedinger PA, Chetelat RT, McClure B, Moyle LC, Rose JKC, Stack SM, van der Knaap E,**  
797 **Baek YS, Lopez-Casado G, Covey PA, et al. 2011.** Interspecific reproductive barriers in the  
798 tomato clade: opportunities to decipher mechanisms of reproductive isolation. *Sexual Plant*  
799 *Reproduction* **24**: 171–187.
- 800 **Berry PE. 1982.** The Systematics and Evolution of *Fuchsia* Sect. *Fuchsia* (onagraceae). *Annals*  
801 *of the Missouri Botanical Garden* **69**: 1–198.
- 802 **Bouckaert R, Heled J, Kühnert D, Vaughan T, Wu C-H, Xie D, Suchard MA, Rambaut A,**  
803 **Drummond AJ. 2014.** BEAST 2: A Software Platform for Bayesian Evolutionary Analysis.  
804 *PLOS Computational Biology* **10**: e1003537.
- 805 **Broz AK, Guerrero RF, Randle AM, Baek YS, Hahn MW, Bedinger PA. 2017a.**  
806 Transcriptomic analysis links gene expression to unilateral pollen-pistil reproductive barriers.  
807 *BMC Plant Biology* **17**: 81.

- 808 **Broz AK, Randle AM, Sianta SA, Tovar-Méndez A, McClure B, Bedinger PA. 2017b.**  
809 Mating system transitions in *Solanum habrochaites* impact interactions between populations and  
810 species. *The New Phytologist* **213**: 440–454.
- 811 **Bryant D, Bouckaert R, Felsenstein J, Rosenberg NA, RoyChoudhury A. 2012.** Inferring  
812 Species Trees Directly from Biallelic Genetic Markers: Bypassing Gene Trees in a Full  
813 Coalescent Analysis. *Molecular Biology and Evolution* **29**: 1917–1932.
- 814 **Catchen J, Hohenlohe PA, Bassham S, Amores A, Cresko WA. 2013.** Stacks: an analysis tool  
815 set for population genomics. *Molecular Ecology* **22**: 3124–3140.
- 816 **Chalivendra SC, Lopez-Casado G, Kumar A, Kassenbrock AR, Royer S, Tovar-Méndez A,**  
817 **Covey PA, Dempsey LA, Randle AM, Stack SM, et al. 2013.** Developmental onset of  
818 reproductive barriers and associated proteome changes in stigma/styles of *Solanum pennellii*.  
819 *Journal of Experimental Botany* **64**: 265–279.
- 820 **Chung IK, Ito T, Tanaka H, Ohta A, Nan HG, Takagi M. 1994.** Molecular diversity of three  
821 S-allele cDNAs associated with gametophytic self-incompatibility in *Lycopersicon peruvianum*.  
822 *Plant Molecular Biology* **26**: 757–762.
- 823 **Covey PA, Kondo K, Welch L, Frank E, Sianta S, Kumar A, Nuñez R, Lopez-Casado G,**  
824 **Knaap EVD, Rose JKC, et al. 2010.** Multiple features that distinguish unilateral incongruity  
825 and self-incompatibility in the tomato clade. *The Plant Journal* **64**: 367–378.
- 826 **Danecek P, Auton A, Abecasis G, Albers CA, Banks E, DePristo MA, Handsaker RE,**  
827 **Lunter G, Marth GT, Sherry ST, et al. 2011.** The variant call format and VCFtools.  
828 *Bioinformatics* **27**: 2156–2158.
- 829 **Darwin C. 1859.** *On the origin of the species by means of natural selection: Or, The*  
830 *preservation of favoured races in the struggle for life*. John Murray.
- 831 **Edgar RC. 2004.** MUSCLE: multiple sequence alignment with high accuracy and high  
832 throughput. *Nucleic Acids Research* **32**: 1792–1797.
- 833 **Fan P, Miller AM, Liu X, Jones AD, Last RL. 2017.** Evolution of a flipped pathway creates  
834 metabolic innovation in tomato trichomes through BAHD enzyme promiscuity. *Nature*  
835 *Communications* **8**: 2080.
- 836 **Fan P, Moghe GD, Last RL. 2016.** Comparative biochemistry and in vitro pathway  
837 reconstruction as powerful partners in studies of metabolic diversity. In: O'Connor SE, ed.  
838 *Synthetic Biology and Metabolic Engineering in Plants and Microbes Part B: Metabolism in*  
839 *Plants. Methods in Enzymology*. Academic Press, 1–17.
- 840 **Finkers R, van Heusden AW, Meijer-Dekens F, van Kan JAL, Maris P, Lindhout P. 2007.**  
841 The construction of a *Solanum habrochaites* LYC4 introgression line population and the  
842 identification of QTLs for resistance to *Botrytis cinerea*. *TAG. Theoretical and Applied Genetics*.  
843 *Theoretische Und Angewandte Genetik* **114**: 1071–1080.

- 844 **Francis RM. 2017.** pophelper: an R package and web app to analyse and visualize population  
845 structure. *Molecular Ecology Resources* **17**: 27–32.
- 846 **Frichot E, François O. 2015.** LEA: An R package for landscape and ecological association  
847 studies. *Methods in Ecology and Evolution* **6**: 925–929.
- 848 **Frichot E, Mathieu F, Trouillon T, Bouchard G, François O. 2014.** Fast and efficient  
849 estimation of individual ancestry coefficients. *Genetics* **196**: 973–983.
- 850 **Gonzales-Vigil E, Hufnagel DE, Kim J, Last RL, Barry CS. 2012.** Evolution of TPS20-  
851 related terpene synthases influences chemical diversity in the glandular trichomes of the wild  
852 tomato relative *Solanum habrochaites*. *The Plant Journal* **71**: 921–935.
- 853 **Harvey MG, Singhal S, Rabosky DL. 2019.** Beyond Reproductive Isolation: Demographic  
854 Controls on the Speciation Process. *Annual Review of Ecology, Evolution, and Systematics* **50**:  
855 75–95.
- 856 **ten Have A, van Berloo R, Lindhout P, van Kan JAL. 2007.** Partial stem and leaf resistance  
857 against the fungal pathogen *Botrytis cinerea* in wild relatives of tomato. *European Journal of*  
858 *Plant Pathology* **117**: 153–166.
- 859 **Howard DJ. 2003.** Speciation: Allopatric. In: eLS. American Cancer Society.
- 860 **Igic B, Busch JW. 2013.** Is self-fertilization an evolutionary dead end? *New Phytologist* **198**:  
861 386–397.
- 862 **Igic B, Lande R, Kohn JR. 2008.** Loss of Self-Incompatibility and Its Evolutionary  
863 Consequences. *International Journal of Plant Sciences* **169**: 93–104.
- 864 **Jakobsson M, Rosenberg NA. 2007.** CLUMPP: a cluster matching and permutation program  
865 for dealing with label switching and multimodality in analysis of population structure.  
866 *Bioinformatics (Oxford, England)* **23**: 1801–1806.
- 867 **Jombart T. 2008.** adegenet: a R package for the multivariate analysis of genetic markers.  
868 *Bioinformatics (Oxford, England)* **24**: 1403–1405.
- 869 **Jombart T, Ahmed I. 2011.** adegenet 1.3-1: new tools for the analysis of genome-wide SNP  
870 data. *Bioinformatics (Oxford, England)* **27**: 3070–3071.
- 871 **Kilambi HV, Manda K, Rai A, Charakana C, Bagri J, Sharma R, Sreelakshmi Y. 2017.**  
872 Green-fruited *Solanum habrochaites* lacks fruit-specific carotenogenesis due to metabolic and  
873 structural blocks. *Journal of Experimental Botany* **68**: 4803–4819.
- 874 **Kim J, Kang K, Gonzales-Vigil E, Shi F, Jones AD, Barry CS, Last RL. 2012.** Striking  
875 natural diversity in glandular trichome acylsugar composition is shaped by variation at the  
876 Acyltransferase2 locus in the wild tomato *Solanum habrochaites*. *Plant physiology* **160**: 1854–  
877 1870.

- 878 **Knapp S, Spooner DM. 1999.** A New Name for a Common Ecuadorian and Peruvian Wild  
879 Tomato Species. *Novon* **9**: 375–376.
- 880 **Kondo K, Yamamoto M, Itahashi R, Sato T, Egashira H, Hattori T, Kowyama Y. 2002.**  
881 Insights into the evolution of self-compatibility in *Lycopersicon* from a study of stylar factors.  
882 *The Plant Journal* **30**: 143–153.
- 883 **Kumar S, Stecher G, Tamura K. 2016.** MEGA7: Molecular Evolutionary Genetics Analysis  
884 Version 7.0 for Bigger Datasets. *Molecular Biology and Evolution* **33**: 1870–1874.
- 885 **Lande R, Schemske DW. 1985.** The Evolution of Self-Fertilization and Inbreeding Depression  
886 in Plants. I. Genetic Models. *Evolution* **39**: 24–40.
- 887 **Leckie BM, D’Ambrosio DA, Chappell TM, Halitschke R, De Jong DM, Kessler A,**  
888 **Kennedy GG, Mutschler MA. 2016.** Differential and synergistic functionality of acylsugars in  
889 suppressing oviposition by insect herbivores. *PloS One* **11**: e0153345.
- 890 **Li H. 2013.** Aligning sequence reads, clone sequences and assembly contigs with BWA-MEM.  
891 *arXiv:1303.3997 [q-bio]*.
- 892 **Li H, Handsaker B, Wysoker A, Fennell T, Ruan J, Homer N, Marth G, Abecasis G,**  
893 **Durbin R, 1000 Genome Project Data Processing Subgroup. 2009.** The Sequence  
894 Alignment/Map format and SAMtools. *Bioinformatics (Oxford, England)* **25**: 2078–2079.
- 895 **Lischer HEL, Excoffier L. 2012.** PGDSpider: an automated data conversion tool for connecting  
896 population genetics and genomics programs. *Bioinformatics* **28**: 298–299.
- 897 **Markova DN, Petersen JJ, Qin X, Short DR, Valle MJ, Tovar-Méndez A, McClure BA,**  
898 **Chetelat RT. 2016.** Mutations in two pollen self-incompatibility factors in geographically  
899 marginal populations of *Solanum habrochaites* impact mating system transitions and  
900 reproductive isolation. *American Journal of Botany* **103**: 1847–1861.
- 901 **Martin FW. 1961.** Complex unilateral hybridization in *Lycopersicon hirsutum*. *Proceedings of*  
902 *the National Academy of Sciences* **47**: 855–857.
- 903 **Martin FW. 1963.** Distribution and Interrelationships of Incompatibility Barriers in the  
904 *Lycopersicon Hirsutum* Humb. and Bonpl. Complex. *Evolution* **17**: 519–528.
- 905 **McClure B, Mou B, Canevascini S, Bernatzky R. 1999.** A small asparagine-rich protein  
906 required for S-allele-specific pollen rejection in *Nicotiana*. *Proceedings of the National Academy*  
907 *of Sciences* **96**: 13548–13553.
- 908 **Miller MR, Dunham JP, Amores A, Cresko WA, Johnson EA. 2007.** Rapid and cost-effective  
909 polymorphism identification and genotyping using restriction site associated DNA (RAD)  
910 markers. *Genome Research* **17**: 240–248.
- 911 **Mutschler MA, Liedl BE. 1994.** Interspecific crossing barriers in *Lycopersicon* and their  
912 relationship to self-incompatibility. In: Williams EG, Clarke AE, Knox RB, eds. *Advances in*



- 913 Cellular and Molecular Biology of Plants. Genetic control of self-incompatibility and  
914 reproductive development in flowering plants. Dordrecht: Springer Netherlands, 164–188.
- 915 **Ortiz E. 2019.** *vcf2phylip v2.0: convert a VCF matrix into several matrix formats for*  
916 *phylogenetic analysis*. Zenodo.
- 917 **Pannell JR, Auld JR, Brandvain Y, Burd M, Busch JW, Cheptou P-O, Conner JK,**  
918 **Goldberg EE, Grant A-G, Grossenbacher DL, et al. 2015.** The scope of Baker’s law. *New*  
919 *Phytologist* **208**: 656–667.
- 920 **Pease JB, Haak DC, Hahn MW, Moyle LC. 2016.** Phylogenomics Reveals Three Sources of  
921 Adaptive Variation during a Rapid Radiation. *PLOS Biology* **14**: e1002379.
- 922 **Peralta IE, Spooner DM, Knapp S. 2008.** Taxonomy of wild tomatoes and their relatives  
923 (Solanum sect. Lycopersicoides, sect. Juglandifolia, sect. Lycopersicon; Solanaceae). *Systematic*  
924 *Botany Monographs* **84**.
- 925 **Pickrell JK, Pritchard JK. 2012.** Inference of population splits and mixtures from genome-  
926 wide allele frequency data. *PLoS genetics* **8**: e1002967.
- 927 **Pritchard JK, Stephens M, Donnelly P. 2000.** Inference of population structure using  
928 multilocus genotype data. *Genetics* **155**: 945–959.
- 929 **Revell LJ. 2012.** phytools: an R package for phylogenetic comparative biology (and other  
930 things). *Methods in Ecology and Evolution* **3**: 217–223.
- 931 **Reznick DN, Ricklefs RE. 2009.** Darwin’s bridge between microevolution and macroevolution.  
932 *Nature* **457**: 837–842.
- 933 **Richter M, Dierl K-H, Emck P, Thorsten P, Beck E. 2009.** Reasons for an outstanding plant  
934 diversity in the tropical Andes of Southern Ecuador. *Landscape Online* **12**: 16–6.
- 935 **Rick C, Chetelat R. 1991.** The breakdown of self-incompatibility in *Lycopersicon hirsutum*. In:  
936 Hawkes L, Nee M, Estrada N, eds. Solanaceae III: taxonomy, chemistry, evolution. London, UK:  
937 Royal Botanic Gardens Kew and Linnean Society of London, 253–256.
- 938 **Rick CM, Fobes JF, Tanksley SD. 1979.** Evolution of mating systems in *Lycopersicon*  
939 *hirsutum* as deduced from genetic variation in electrophoretic and morphological characters.  
940 *Plant Systematics and Evolution* **132**: 279–298.
- 941 **Rochette NC, Rivera-Colón AG, Catchen JM. 2019.** Stacks 2: Analytical methods for paired-  
942 end sequencing improve RADseq-based population genomics. *Molecular Ecology* **28**: 4737–  
943 4754.
- 944 **Sacks EJ, St. Clair DA. 1998.** Variation among seven genotypes of *Lycopersicon esculentum*  
945 and 36 accessions of *L. hirsutum* for interspecific crossability. *Euphytica* **101**: 185–191.

- 946 **Schemske DW, Lande R. 1985.** The Evolution of Self-Fertilization and Inbreeding Depression  
947 in Plants. Ii. Empirical Observations. *Evolution* **39**: 41–52.
- 948 **Schillmiller AL, Moghe GD, Fan P, Ghosh B, Ning J, Jones AD, Last RL. 2015.** Functionally  
949 divergent alleles and duplicated loci encoding an acyltransferase contribute to acylsugar  
950 metabolite diversity in *Solanum* trichomes. *The Plant Cell* **27**: 1002–1017.
- 951 **Sifres A, Blanca J, Nuez F. 2011.** Pattern of genetic variability of *Solanum habrochaites* in its  
952 natural area of distribution. *Genetic Resources and Crop Evolution* **58**: 347–360.
- 953 **Sillitoe RH. 1974.** Tectonic segmentation of the Andes: implications for magmatism and  
954 metallogeny. *Nature* **250**: 542–545.
- 955 **Stebbins GL. 1957.** Self Fertilization and Population Variability in the Higher Plants. *The*  
956 *American Naturalist* **91**: 337–354.
- 957 **Sunde J, Yıldırım Y, Tibblin P, Forsman A. 2020.** Comparing the Performance of  
958 Microsatellites and RADseq in Population Genetic Studies: Analysis of Data for Pike (*Esox*  
959 *lucius*) and a Synthesis of Previous Studies. *Frontiers in Genetics* **11**.
- 960 **Takayama S, Isogai A. 2005.** Self-incompatibility in plants. *Annual Review of Plant Biology* **56**:  
961 467–489.
- 962 **Takebayashi N, Morrell PL. 2001.** Is self-fertilization an evolutionary dead end? Revisiting an  
963 old hypothesis with genetic theories and a macroevolutionary approach. *American Journal of*  
964 *Botany* **88**: 1143–1150.
- 965 **Tomato Genetics Resource Center.**
- 966 **Tovar-Méndez A, Kumar A, Kondo K, Ashford A, Baek YS, Welch L, Bedinger PA,**  
967 **McClure BA. 2014.** Restoring pistil-side self-incompatibility factors recapitulates an  
968 interspecific reproductive barrier between tomato species. *The Plant Journal* **77**: 727–736.
- 969 **Tovar-Méndez A, Lu L, McClure B. 2017.** HT proteins contribute to S-RNase-independent  
970 pollen rejection in *Solanum*. *The Plant Journal: For Cell and Molecular Biology* **89**: 718–729.
- 971 **Tsugawa H, Cajka T, Kind T, Ma Y, Higgins B, Ikeda K, Kanazawa M, VanderGheynst J,**  
972 **Fiehn O, Arita M. 2015.** MS-DIAL: data-independent MS/MS deconvolution for  
973 comprehensive metabolome analysis. *Nature Methods* **12**: 523–526.
- 974 **Vieira J, Fonseca NA, Vieira CP. 2008.** An S-RNase-Based Gametophytic Self-Incompatibility  
975 System Evolved Only Once in Eudicots. *Journal of Molecular Evolution* **67**: 179–190.
- 976 **Weigend M. 2002.** Observations on the Biogeography of the Amotape-Huancabamba Zone in  
977 Northern Peru. *Botanical Review* **68**: 38–54.

- 978 **Weigend M. 2004.** Additional observations on the biogeography of the Amotape- Huancabamba  
979 zone in Northern Peru: Defining the South-Eastern limits. *Revista Peruana de Biología* **11**: 127–  
980 134.
- 981 **Weinhold A, Baldwin IT. 2011.** Trichome-derived *O*-acyl sugars are a first meal for caterpillars  
982 that tags them for predation. *Proceedings of the National Academy of Sciences of the United*  
983 *States of America* **108**: 7855–7859.
- 984 **Weir BS. 2012.** Estimating F-statistics: A historical view. *Philosophy of science* **79**: 637–643.
- 985 **von Wettberg EJB, Chang PL, Başdemir F, Carrasquilla-Garcia N, Korbu LB, Moenga**  
986 **SM, Bedada G, Greenlon A, Moriuchi KS, Singh V, et al. 2018.** Ecology and genomics of an  
987 important crop wild relative as a prelude to agricultural innovation. *Nature Communications* **9**:  
988 649.
- 989 **Wright S. 1931.** Evolution in Mendelian Populations. *Genetics* **16**: 97–159.
- 990 **Zhang C, Dong S-S, Xu J-Y, He W-M, Yang T-L. 2019.** PopLDdecay: a fast and effective tool  
991 for linkage disequilibrium decay analysis based on variant call format files. *Bioinformatics*  
992 *(Oxford, England)* **35**: 1786–1788.
- 993 **Zheng X, Levine D, Shen J, Gogarten SM, Laurie C, Weir BS. 2012.** A high-performance  
994 computing toolset for relatedness and principal component analysis of SNP data. *Bioinformatics*  
995 *(Oxford, England)* **28**: 3326–3328.
- 996

# Figure 1

bioRxiv preprint doi: <https://doi.org/10.1101/2020.09.09.289744>; this version posted September 10, 2020. The copyright holder for this preprint (which was not certified by peer review) is the author/funder. All rights reserved. No reuse allowed without permission.

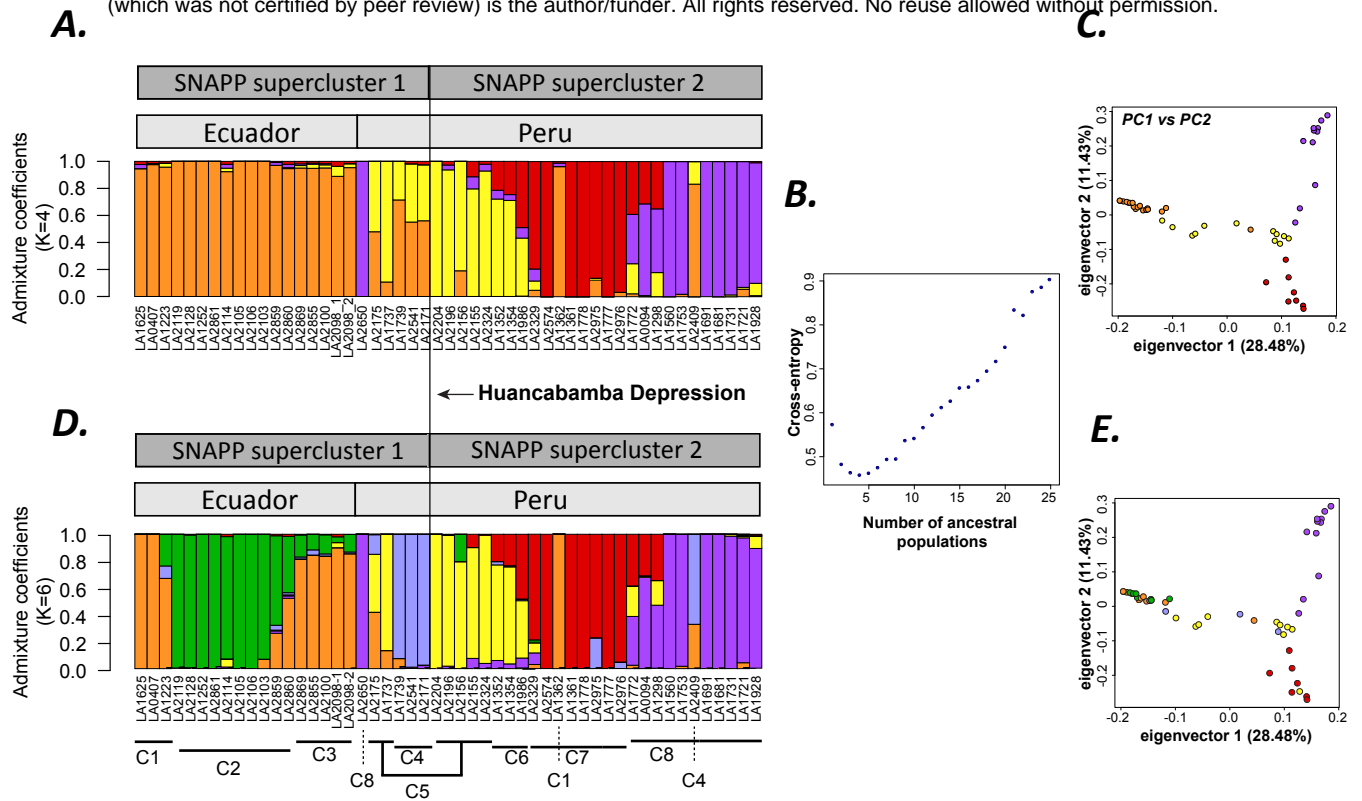

**Figure 1: Population structure of *S. habrochaites*** (A, D) Population structure plots obtained using K=4 and K=6 as pre-defined population clusters using Set 1 SNPs. Population cluster numbers as per Fig. 2A are described below the barplot in (D). (B) Cross-entropy criterion showing K=4 as the optimal number of genetically differentiated ancestral populations. (C, E) Principal Components Analysis, with populations defined based on K=4 and K=6 as shown in sub-figures A,D, respectively.

## Figure 2

bioRxiv preprint doi: <https://doi.org/10.1101/2020.09.09.289744>; this version posted September 10, 2020. The copyright holder for this preprint (which was not certified by peer review) is the author/funder. All rights reserved. No reuse allowed without permission.

A.

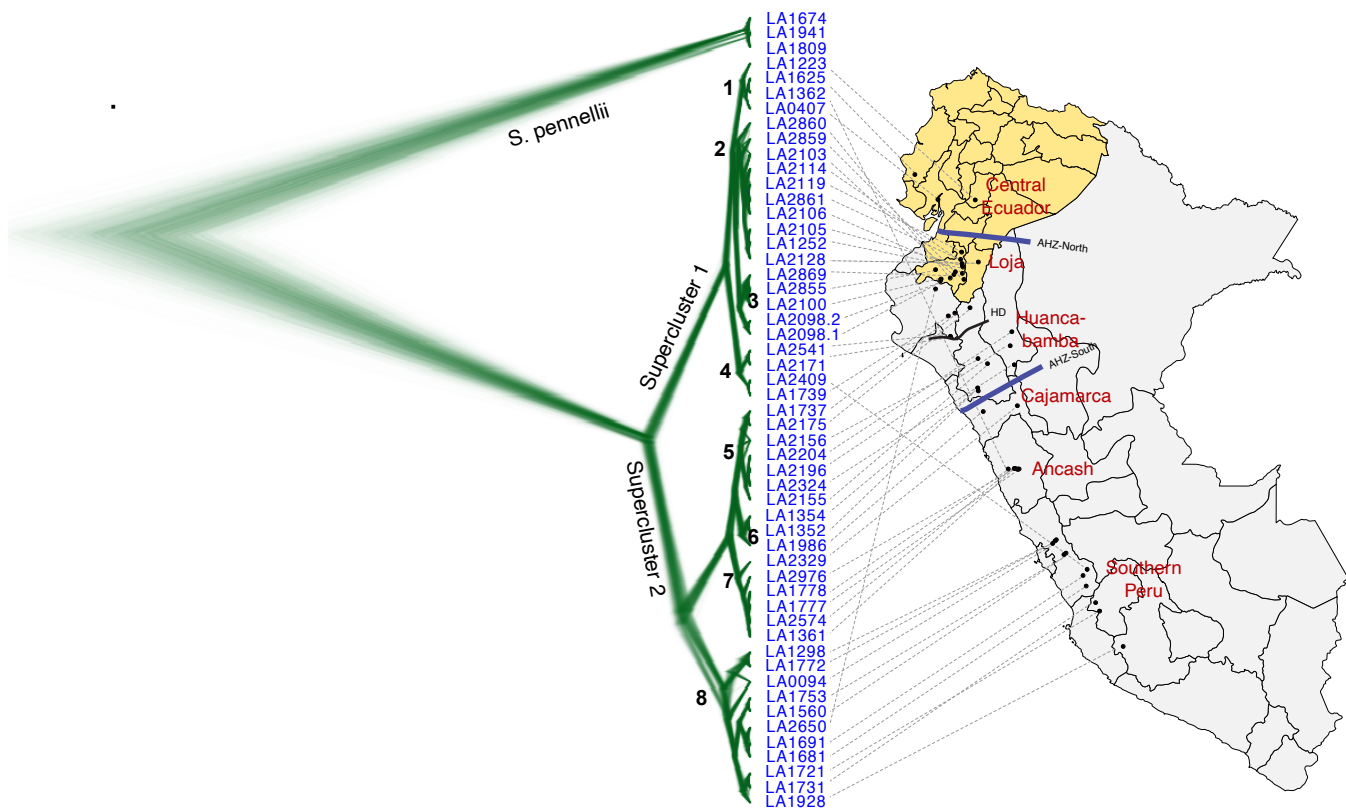

B.

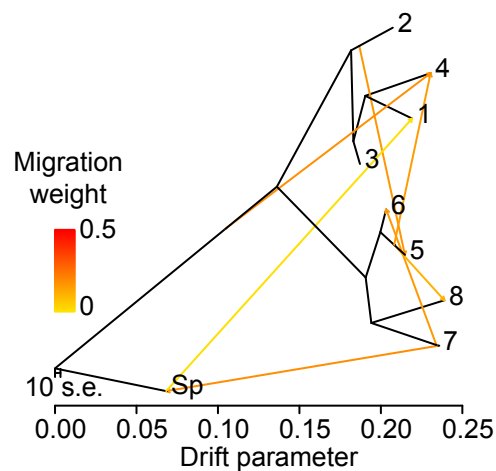

**Figure 2: Coalescent and migration analysis** (A) Results of coalescent analysis using SNAPP, obtained using markers shared between all sampled individuals. LA2975 was left out from this analysis because its level of heterozygosity was >3X the next highest sample, suggesting possible contamination or other unexplained behavior. AHZ: Amotape-Huancabamba Zone. HD: Huancabamba Depression. Population cluster numbers are marked within the phylogeny. (B) TreeMix analysis showing inferred migration events between different clusters. Migration weight indicates confidence in a given inferred migration event. Tree obtained in (A) is using coalescent Bayesian analysis while that in (B) is using maximum likelihood analysis by the individual software packages.

### Figure 3

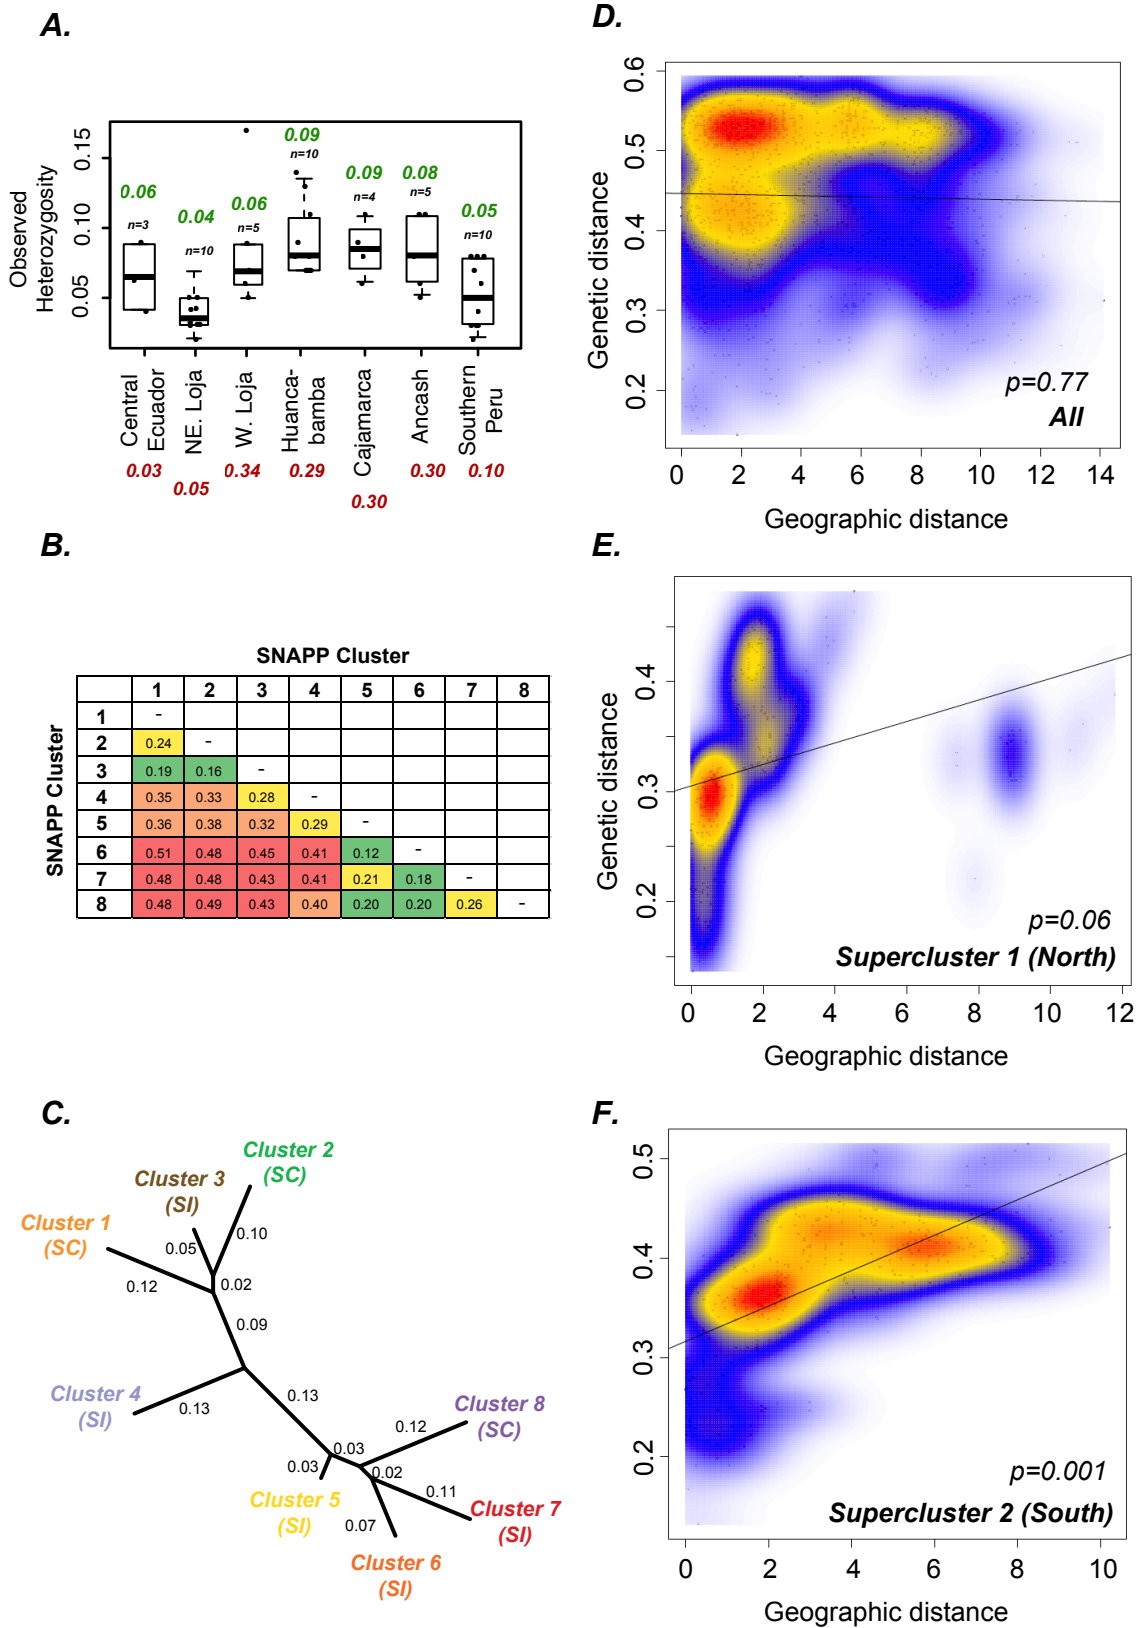

**Figure 3: Analysis of population relatedness and demographic events** (A) Observed heterozygosity estimates for individuals classified by their geographic regions. Northeastern Loja and Western Loja all comprise individuals assigned to clusters 2 and 3, respectively. Number in green above the boxplot corresponds to the average heterozygosity from this study, while those in red below the region names correspond to SSR marker estimates of observed heterozygosity as per Sifres et al, 2011. Outlier value of LA2098-2 was excluded when calculating average for W. Loja. (B) Estimates of pairwise  $F_{st}$  between SNAPP coalescent clusters. Cells are colored as green (high  $F_{st}$ ;  $<0.20$ ), yellow (intermediate high  $F_{st}$ ;  $0.21-0.30$ ); orange (intermediate low  $F_{st}$ ;  $0.31-0.40$ ) and red (low  $F_{st}$ ;  $>0.40$ ). (C) Dendrogram based on the  $F_{st}$  matrix shows differentiation between clusters that follows the two SNAPP superclusters. Branch-wise  $F_{st}$  values are shown (D-F) Isolation by Distance analysis considering all *S. habrochaites* individuals, as well as those in Supercluster 1 and Supercluster 2. Mantel's test  $p$ -values were estimated using 100,000 simulated permutations of the LD pruned Set SNPs.

## Figure 4

A.

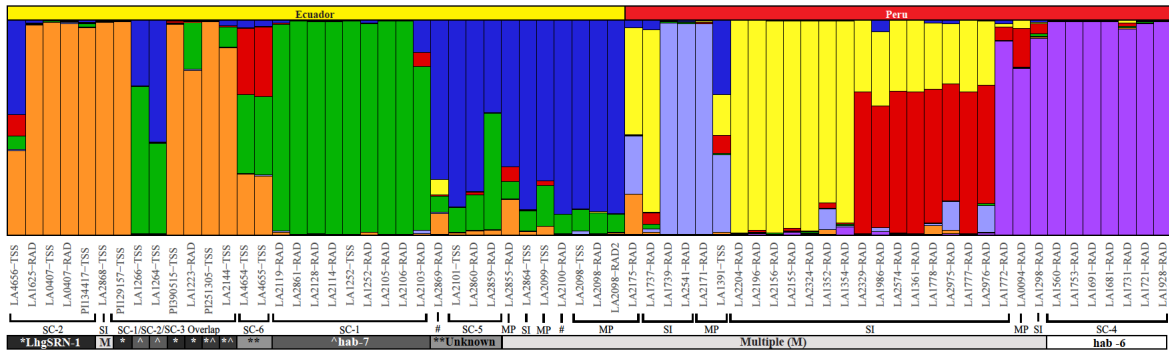

B.

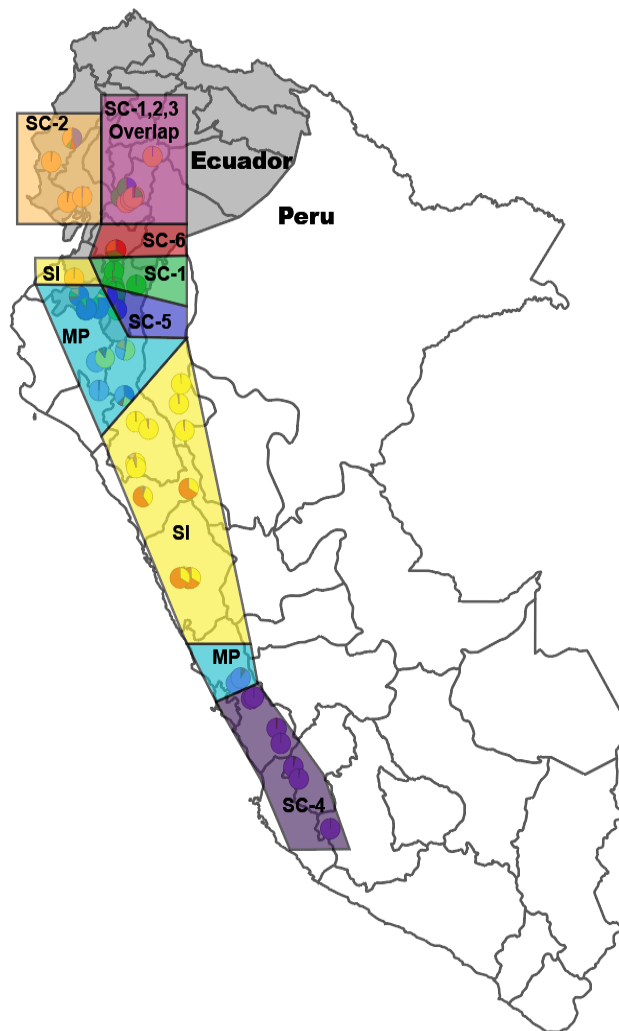

**Figure 4. Mating system and population structure in *Solanum habrochaites*.** (A) Population structure plot incorporating accessions analyzed using RAD-seq and targeted Sanger sequencing (TSS) organized in a north to south array from left to right. Mating systems indicated include SC groups 1-6 (Table 1), Mixed Population (MP) accessions containing both SI and SC individuals as well as purely SI accessions (SI). #, mating system not assessed. Where known, specific S-RNase alleles associated with accessions are indicated. \*accessions containing the LhgSRN-1S-RNase allele, ^accessions containing the hab-7 S-RNase allele, \*\*S-RNase allele unknown, and multiple (M) S-RNase alleles are found in SI and MP accessions. (B) Map of Ecuador and Peru displaying the locations of accessions with different mating systems as shown in (A) and listed in Table 1.

**Figure 5**

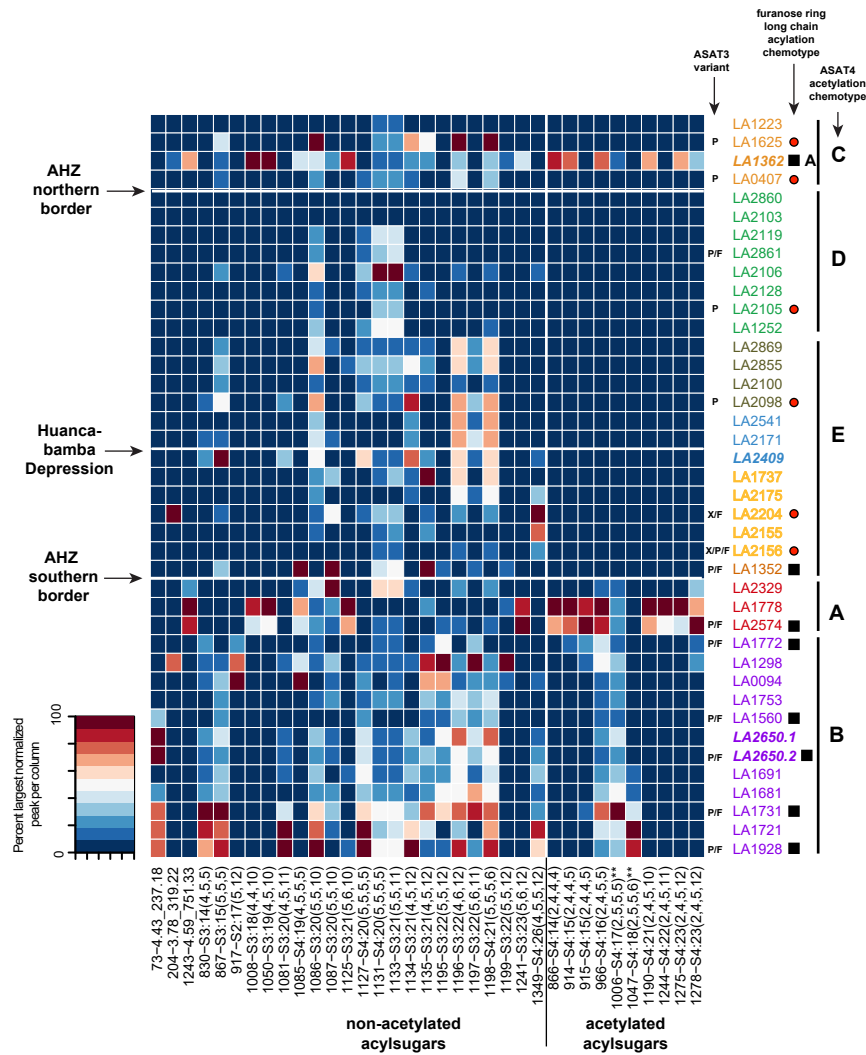

**Figure 5: Acylsugar phenotypes across *Solanum habrochaites* accessions and the genotypes of two associated enzymes.** Heatmap of acylsugar peak areas normalized to the internal standard peak area and the maximum area per column. Rows and columns were arranged based on Fig. 2A dendrogram and types of acylsugars, respectively. Accessions are colored by their population cluster assignments, using scheme used in Fig. 1D. Three accessions in bold are the geographically misplaced accessions. X/P/F indicate the three ASAT3 variants found in Schillmiller et al, 2015, while black squares and red circles indicate presence and absence of sucrose furanose ring long chain acylation as per the same study. Note that the black squares are associated with presence of both P/F while the red circles are largely associated with presence of only P. ASAT4 inactivation chemotypes (A,B,C,D,E) as per Kim et al, 2012 are also shown. Note that A,B have acetylated acylsugars and C,D,E contain only non-acetylated acylsugars, due to ASAT4 loss. Column names are in the format (peakID-identified acylsugar). Acylsugars with asterisks indicate those predicted based on MS1 peak and Kim et al, 2012 study without high-confidence MS/MS patterns.



## Figure 6

bioRxiv preprint doi: <https://doi.org/10.1101/2020.09.09.289744>; this version posted September 10, 2020. The copyright holder for this preprint (which was not certified by peer review) is the author/funder. All rights reserved. No reuse allowed without permission.

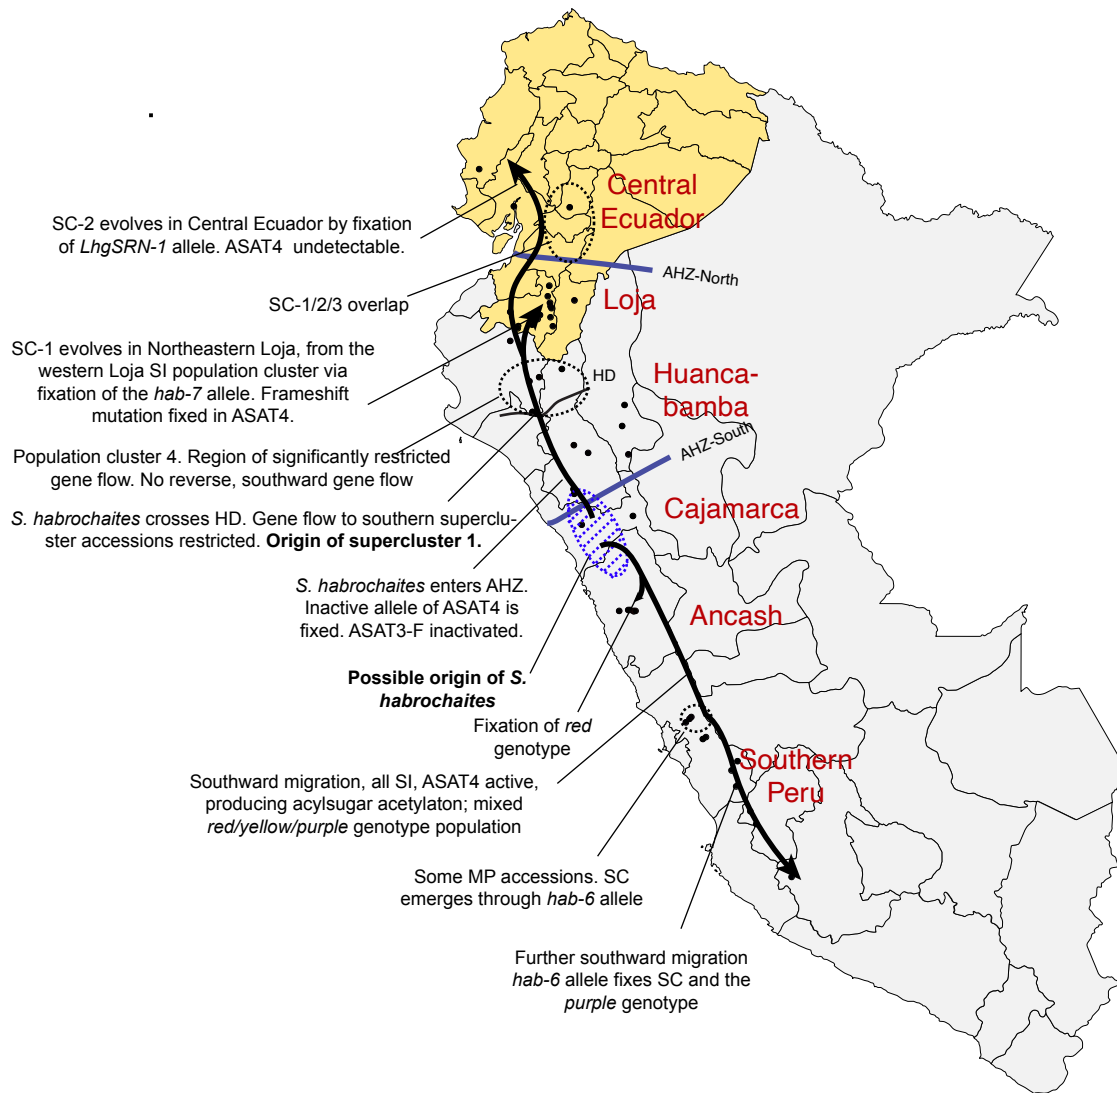

**Figure 6: Overall model for *Solanum habrochaites* evolution.** This model is based on integrative analysis of the data presented in this paper. Color names noted are as per the colors used in Fig. 1D. Region names refer to the ecogeographic groups of accessions based on Sifres et al., 2011. Accession-specific details of mating systems and acylsugar phenotypes are described in Supplementary Figure S9.
